# Supplementary material
Source: PubMed Central journal article supplement (PMC6862343)
Supplement: ml9b00401_si_001.pdf [file ml9b00401_si_001.pdf]

## Impact of minor structural modifications on properties of a series of mTOR inhibitors

Gilles Ouvry,\* Laurence Clary, Loïc Tomas, Michèle Aurelly, Laetitia Bonnary, Emilie Borde, Claire Bouix-Peter, Laurent Chantalat, Claire Defoin-Platel, Sophie Deret, Mathieu Forissier, Craig S. Harris, Tatiana Isabet, Laurent Lamy, Anne-Pascale Luzy, Jonathan Pascau, Catherine Soulet, Alessandro Taddei, Nathalie Taquet, Etienne Thoreau, Emeric Varvier, Emmanuel Vial and Laurent F. Hennequin

### Contents of SI

|                                                   |     |
|---------------------------------------------------|-----|
| Chrom LogD .....                                  | S1  |
| Solubility in H <sub>2</sub> O .....              | S1  |
| Human microsome stability .....                   | S2  |
| Human hepatocytes stability .....                 | S2  |
| Pharmacological assays.....                       | S2  |
| Kinase selectivity panel.....                     | S3  |
| Synthesis and characterization of compounds ..... | S14 |

### ChromLogD

Reference and test compounds are solubilized in methanol at 0.5 mM. An aliquot was injected onto the UPLC/UV system and the retention times (RT) were measured with different mobile phases at pH 6.5. A calibration curve was performed with reference compounds by plotting the highest RT of each compound. The RT measured for each test compound was converted to Chromatographic Hydrophobicity Index (CHI) value by using the calibration curve established with reference compounds.<sup>1</sup> The CHI was then converted to ChromLogD using the equation established by Young:  $CHI * 0.0857 - 2$ .<sup>2</sup>

### Solubility in H<sub>2</sub>O

Compounds from a stock solution in DMSO (10mM) were dissolved at 100µM into a phosphate buffer solution pH7.4 and were shaken during 24H at 20°C.

After filtration and dilution, the samples were quantified using a High performance liquid chromatography method by comparison from standards.

### **Human microsome metabolic stability**

Human liver microsomes are used (pooled from a 35 individuals for human). Incubations are performed at a test compound concentration of 1 $\mu$ M at 37°C with 0.5mg protein/mL in presence of phase I metabolism cofactors. The final DMSO concentration in the incubation is 0.1 %. Control incubations are also performed in lysed microsomes to reveal any non-enzymatic degradation. Control compound (phase 1 metabolism) is included. Samples (65 $\mu$ L) are removed from the incubation mixture at 0 and 15 min and added to acetonitrile:water (75:25), containing internal standard, (175 $\mu$ L) to stop the reaction. Samples are analyzed by LC-MS/MS. % Parent Compound at 15 min is calculated.

### **Human hepatocytes metabolic stability**

Suspension of cryopreserved human hepatocytes was used (pooled from a 10 individuals). Incubations were performed at a test compound concentration of 1 $\mu$ M at 37°C and 5% CO<sub>2</sub>. The cell density was 0.5x 10<sup>6</sup> viable cells/ml. The final DMSO concentration in the incubation is 0.1 %. Control incubations were also performed in lysed cells to reveal any non-enzymatic degradation. Two control compounds (phase 1 and 2 metabolism) were included with each species. Samples (65 $\mu$ L) were removed from the incubation mixture at 0, 5, 15, 30, 60 and 90 min (control sample at 90min only) and added to acetonitrile:water (75:25), containing internal standard, (175 $\mu$ L) to stop the reaction. Samples were analyzed by LC-MS/MS. Half-life and intrinsic clearance were calculated.

### **Biochemical assay**

mTOR biochemical LanthaScreen™ assays were performed in a 10  $\mu$ L volume in low-volume 384-well plates (Corning 4514). According to the manufacturer (Lifetechnologies), the concentration of substrate was 400 nM, and the 1x kinase reaction buffer consisted of 50 mM HEPES pH 7.5, 0.01% Tween 20, 1 mM EGTA, 10 mM MnCl<sub>2</sub>, and 2 mM DTT. Reactions were allowed to proceed for 1 hour (linear phase) at room temperature in the presence and in the absence of compounds at 1% DMSO before a 10  $\mu$ L preparation of EDTA (20 mM) and Tb-labeled antibody (4 nM) in TR-FRET dilution buffer were added. The final concentrations of antibody and EDTA in the assay were 2 nM and 10 mM respectively. Plates were allowed to incubate at room temperature for at least 30 minutes before being read on a plate reader configured for LanthaScreen™ TR-FRET.

For PI3K $\alpha$ , enzymatic reaction was performed in a 10  $\mu$ L volume, using low-volume 384-well plates (Corning 4514). The concentration of substrate (PIP2) was 10  $\mu$ M, and the 1X kinase reaction buffer consisted of proprietary EUROFIN buffer plus 5 mM DTT. Kinase reaction was allowed to proceed for 30 minutes (linear phase) at room temperature before a 10  $\mu$ L preparation of STOP solution (STOP A and B) and Detection mix (DMC A, B and C) were added. Plate was incubated at room temperature for at least 2 hours before being read on a plate reader configured for TR-FRET.

## Cellular assay

A431 cells were seeded on poly-L-lysine coated plates at 25000 cells/well in DMEM medium. Before experiments cells were starved and maintained in culture for 24 hours. The day of the experiment cells were treated with increasing compounds concentrations (final DMSO%=0.1) for 3 hours and level of phosphorylated S6RP (Ser235/236) and AKT (Ser473) were measured by HTRF (CISBIO) kit following protocols of the provider.

## DiscoverX ScanMax Kinome Binding Scan

Compounds were tested at 10  $\mu$ M concentration against a panel of 442 known protein kinases. Data are presented as percent of control activity remaining. (0% indicates very tight binders, 100% indicates no binding).

| DiscoverX Gene Symbol         | Entrez Gene Symbol | Percent Control |     |     |      |     |      |     |     |     |
|-------------------------------|--------------------|-----------------|-----|-----|------|-----|------|-----|-----|-----|
|                               |                    | 4a              | 3e  | 3j  | 3k   | 6a  | 1    | 6e  | 3b  | 4b  |
| AAK1                          | AAK1               | 92              | 67  | 81  | 27   | 49  | 77   | 73  | 81  | 49  |
| ABL1(E255K)-phosphorylated    | ABL1               | 92              | 29  | 22  | 0.8  | 66  | 2.4  | 74  | 57  | 93  |
| ABL1(F317I)-nonphosphorylated | ABL1               | 95              | 90  | 79  | 79   | 84  | 94   | 100 | 100 | 100 |
| ABL1(F317I)-phosphorylated    | ABL1               | 66              | 50  | 54  | 41   | 73  | 21   | 100 | 100 | 100 |
| ABL1(F317L)-nonphosphorylated | ABL1               | 93              | 81  | 33  | 62   | 60  | 35   | 100 | 100 | 100 |
| ABL1(F317L)-phosphorylated    | ABL1               | 78              | 31  | 15  | 20   | 46  | 4.6  | 100 | 89  | 99  |
| ABL1(H396P)-nonphosphorylated | ABL1               | 78              | 26  | 13  | 0.25 | 17  | 0.15 | 74  | 65  | 70  |
| ABL1(H396P)-phosphorylated    | ABL1               | 82              | 49  | 28  | 0.1  | 49  | 3.4  | 87  | 69  | 100 |
| ABL1(M351T)-phosphorylated    | ABL1               | 84              | 56  | 36  | 0.4  | 50  | 5.3  | 100 | 92  | 100 |
| ABL1(Q252H)-nonphosphorylated | ABL1               | 80              | 15  | 11  | 0.65 | 46  | 0.4  | 86  | 46  | 93  |
| ABL1(Q252H)-phosphorylated    | ABL1               | 90              | 39  | 22  | 0.3  | 19  | 5    | 100 | 100 | 100 |
| ABL1(T315I)-nonphosphorylated | ABL1               | 98              | 100 | 80  | 2.7  | 81  | 64   | 100 | 100 | 100 |
| ABL1(T315I)-phosphorylated    | ABL1               | 90              | 75  | 80  | 0.8  | 78  | 44   | 93  | 96  | 99  |
| ABL1(Y253F)-phosphorylated    | ABL1               | 71              | 47  | 22  | 0.15 | 41  | 6    | 100 | 89  | 100 |
| ABL1-nonphosphorylated        | ABL1               | 54              | 29  | 16  | 0.25 | 64  | 2.8  | 54  | 44  | 80  |
| ABL1-phosphorylated           | ABL1               | 72              | 42  | 24  | 0.2  | 82  | 4.3  | 72  | 71  | 87  |
| ABL2                          | ABL2               | 96              | 63  | 74  | 21   | 100 | 36   | 97  | 93  | 100 |
| ACVR1                         | ACVR1              | 88              | 96  | 81  | 62   | 100 | 0.55 | 100 | 100 | 91  |
| ACVR1B                        | ACVR1B             | 100             | 96  | 84  | 88   | 87  | 13   | 86  | 90  | 100 |
| ACVR2A                        | ACVR2A             | 85              | 95  | 98  | 100  | 100 | 3.8  | 76  | 97  | 93  |
| ACVR2B                        | ACVR2B             | 88              | 98  | 99  | 98   | 100 | 6.3  | 54  | 80  | 86  |
| ACVRL1                        | ACVRL1             | 67              | 73  | 72  | 96   | 100 | 24   | 89  | 100 | 94  |
| ADCK3                         | CABC1              | 85              | 60  | 31  | 99   | 95  | 90   | 87  | 86  | 91  |
| ADCK4                         | ADCK4              | 99              | 100 | 68  | 68   | 100 | 75   | 84  | 95  | 79  |
| AKT1                          | AKT1               | 95              | 100 | 88  | 100  | 100 | 67   | 97  | 98  | 100 |
| AKT2                          | AKT2               | 92              | 100 | 75  | 83   | 98  | 80   | 86  | 100 | 100 |
| AKT3                          | AKT3               | 100             | 100 | 100 | 100  | 96  | 44   | 100 | 84  | 91  |
| ALK                           | ALK                | 100             | 99  | 86  | 31   | 72  | 78   | 100 | 100 | 100 |
| ALK(C1156Y)                   | ALK                | 100             | 84  | 90  | 26   | 64  | 33   | 97  | 90  | 87  |
| ALK(L1196M)                   | ALK                | 93              | 95  | 99  | 35   | 72  | 92   | 97  | 97  | 92  |

|               |        |     |     |     |     |     |      |     |     |     |
|---------------|--------|-----|-----|-----|-----|-----|------|-----|-----|-----|
| AMPK-alpha1   | PRKAA1 | 80  | 83  | 86  | 69  | 100 | 92   | 100 | 100 | 100 |
| AMPK-alpha2   | PRKAA2 | 87  | 98  | 81  | 87  | 100 | 79   | 77  | 100 | 100 |
| ANKK1         | ANKK1  | 76  | 88  | 54  | 9.9 | 64  | 95   | 100 | 100 | 100 |
| ARK5          | NUAK1  | 100 | 92  | 91  | 33  | 66  | 95   | 100 | 89  | 100 |
| ASK1          | MAP3K5 | 95  | 99  | 99  | 23  | 100 | 100  | 100 | 100 | 96  |
| ASK2          | MAP3K6 | 100 | 100 | 91  | 49  | 70  | 99   | 100 | 100 | 98  |
| AURKA         | AURKA  | 99  | 91  | 90  | 16  | 100 | 63   | 95  | 92  | 100 |
| AURKB         | AURKB  | 100 | 99  | 63  | 26  | 90  | 72   | 100 | 94  | 98  |
| AURKC         | AURKC  | 58  | 74  | 79  | 33  | 73  | 69   | 79  | 96  | 89  |
| AXL           | AXL    | 100 | 90  | 61  | 19  | 91  | 34   | 87  | 86  | 96  |
| BIKE          | BMP2K  | 15  | 52  | 70  | 16  | 25  | 63   | 59  | 78  | 75  |
| BLK           | BLK    | 67  | 34  | 18  | 5.8 | 87  | 3.1  | 88  | 97  | 100 |
| BMPR1A        | BMPR1A | 87  | 81  | 100 | 94  | 92  | 18   | 83  | 99  | 100 |
| BMPR1B        | BMPR1B | 69  | 62  | 41  | 8.1 | 83  | 0.05 | 93  | 86  | 93  |
| BMPR2         | BMPR2  | 99  | 97  | 89  | 19  | 42  | 53   | 98  | 79  | 100 |
| BMX           | BMX    | 95  | 93  | 95  | 41  | 85  | 76   | 88  | 99  | 100 |
| BRAF          | BRAF   | 71  | 53  | 43  | 57  | 88  | 36   | 100 | 82  | 63  |
| BRAF(V600E)   | BRAF   | 72  | 43  | 22  | 55  | 80  | 21   | 96  | 80  | 57  |
| BRK           | PTK6   | 83  | 73  | 19  | 75  | 100 | 26   | 68  | 99  | 96  |
| BRSK1         | BRSK1  | 96  | 91  | 85  | 90  | 100 | 99   | 100 | 100 | 96  |
| BRSK2         | BRSK2  | 81  | 89  | 85  | 92  | 94  | 71   | 72  | 85  | 100 |
| BTK           | BTK    | 98  | 100 | 95  | 6.4 | 93  | 100  | 100 | 100 | 100 |
| BUB1          | BUB1   | 77  | 72  | 77  | 16  | 57  | 86   | 100 | 99  | 100 |
| CAMK1         | CAMK1  | 68  | 73  | 71  | 12  | 98  | 57   | 66  | 88  | 48  |
| CAMK1B        | PNCK   | 100 | 100 | 100 | 24  | 100 | 66   | 80  | 100 | 79  |
| CAMK1D        | CAMK1D | 83  | 78  | 67  | 19  | 94  | 53   | 77  | 85  | 72  |
| CAMK1G        | CAMK1G | 95  | 82  | 86  | 54  | 100 | 87   | 100 | 100 | 76  |
| CAMK2A        | CAMK2A | 98  | 100 | 78  | 85  | 100 | 46   | 90  | 91  | 96  |
| CAMK2B        | CAMK2B | 93  | 100 | 84  | 89  | 100 | 60   | 89  | 90  | 88  |
| CAMK2D        | CAMK2D | 92  | 86  | 76  | 84  | 97  | 52   | 94  | 94  | 86  |
| CAMK2G        | CAMK2G | 96  | 79  | 68  | 80  | 94  | 38   | 67  | 87  | 64  |
| CAMK4         | CAMK4  | 61  | 80  | 82  | 100 | 99  | 68   | 93  | 97  | 100 |
| CAMKK1        | CAMKK1 | 100 | 91  | 100 | 100 | 83  | 73   | 80  | 79  | 75  |
| CAMKK2        | CAMKK2 | 86  | 74  | 73  | 67  | 90  | 65   | 77  | 83  | 58  |
| CASK          | CASK   | 78  | 81  | 45  | 70  | 67  | 31   | 99  | 81  | 94  |
| CDC2L1        | CDK11B | 89  | 96  | 86  | 92  | 100 | 100  | 93  | 99  | 91  |
| CDC2L2        | CDC2L2 | 100 | 100 | 98  | 94  | 97  | 94   | 98  | 92  | 66  |
| CDC2L5        | CDK13  | 100 | 94  | 91  | 87  | 77  | 100  | 100 | 100 | 100 |
| CDK11         | CDK19  | 85  | 98  | 86  | 85  | 99  | 21   | 100 | 96  | 100 |
| CDK2          | CDK2   | 100 | 100 | 93  | 100 | 98  | 81   | 83  | 90  | 100 |
| CDK3          | CDK3   | 100 | 94  | 100 | 100 | 91  | 85   | 86  | 92  | 93  |
| CDK4          | CDK4   | 100 | 100 | 100 | 100 | 94  | 92   | 100 | 100 | 100 |
| CDK4-cyclinD1 | CDK4   | 99  | 90  | 99  | 89  | 66  | 100  | 100 | 100 | 100 |
| CDK4-cyclinD3 | CDK4   | 93  | 100 | 97  | 95  | 73  | 100  | 100 | 97  | 100 |
| CDK5          | CDK5   | 90  | 92  | 93  | 100 | 92  | 89   | 87  | 85  | 100 |
| CDK7          | CDK7   | 93  | 100 | 79  | 93  | 69  | 64   | 98  | 93  | 100 |

|                     |          |     |     |     |      |     |      |     |     |     |
|---------------------|----------|-----|-----|-----|------|-----|------|-----|-----|-----|
| CDK8                | CDK8     | 100 | 100 | 95  | 100  | 100 | 42   | 100 | 100 | 100 |
| CDK9                | CDK9     | 87  | 100 | 87  | 93   | 100 | 100  | 98  | 99  | 100 |
| CDKL1               | CDKL1    | 80  | 60  | 70  | 91   | 97  | 66   | 85  | 59  | 88  |
| CDKL2               | CDKL2    | 89  | 89  | 96  | 100  | 94  | 55   | 93  | 93  | 98  |
| CDKL3               | CDKL3    | 79  | 78  | 79  | 97   | 85  | 72   | 81  | 82  | 100 |
| CDKL5               | CDKL5    | 85  | 90  | 94  | 100  | 100 | 100  | 100 | 100 | 100 |
| CHEK1               | CHEK1    | 97  | 96  | 88  | 59   | 100 | 92   | 100 | 93  | 81  |
| CHEK2               | CHEK2    | 91  | 81  | 79  | 37   | 80  | 81   | 88  | 96  | 55  |
| CIT                 | CIT      | 84  | 76  | 81  | 89   | 76  | 76   | 79  | 88  | 86  |
| CLK1                | CLK1     | 89  | 65  | 65  | 24   | 57  | 71   | 92  | 81  | 85  |
| CLK2                | CLK2     | 96  | 95  | 63  | 27   | 40  | 64   | 71  | 79  | 82  |
| CLK3                | CLK3     | 80  | 91  | 84  | 69   | 100 | 68   | 97  | 84  | 100 |
| CLK4                | CLK4     | 72  | 93  | 62  | 46   | 62  | 76   | 84  | 86  | 100 |
| CSF1R               | CSF1R    | 100 | 42  | 12  | 0.05 | 30  | 0.45 | 100 | 79  | 59  |
| CSF1R-autoinhibited | CSF1R    | 100 | 90  | 72  | 0.1  | 37  | 6.2  | 100 | 77  | 97  |
| CSK                 | CSK      | 94  | 99  | 95  | 20   | 100 | 56   | 75  | 86  | 91  |
| CSNK1A1             | CSNK1A1  | 87  | 56  | 22  | 54   | 100 | 5.1  | 58  | 87  | 95  |
| CSNK1A1L            | CSNK1A1L | 84  | 69  | 25  | 54   | 100 | 15   | 96  | 79  | 100 |
| CSNK1D              | CSNK1D   | 71  | 57  | 5.3 | 60   | 100 | 3.4  | 98  | 72  | 77  |
| CSNK1E              | CSNK1E   | 69  | 43  | 1.2 | 58   | 100 | 0.5  | 100 | 66  | 85  |
| CSNK1G1             | CSNK1G1  | 94  | 98  | 95  | 78   | 99  | 93   | 75  | 86  | 93  |
| CSNK1G2             | CSNK1G2  | 76  | 70  | 60  | 48   | 100 | 65   | 98  | 100 | 100 |
| CSNK1G3             | CSNK1G3  | 78  | 62  | 55  | 67   | 100 | 56   | 100 | 90  | 79  |
| CSNK2A1             | CSNK2A1  | 100 | 100 | 97  | 66   | 70  | 95   | 100 | 96  | 100 |
| CSNK2A2             | CSNK2A2  | 100 | 86  | 98  | 74   | 86  | 92   | 81  | 88  | 73  |
| CTK                 | MATK     | 91  | 98  | 79  | 62   | 72  | 54   | 100 | 73  | 98  |
| DAPK1               | DAPK1    | 99  | 94  | 82  | 61   | 93  | 74   | 75  | 84  | 83  |
| DAPK2               | DAPK2    | 100 | 88  | 72  | 65   | 96  | 63   | 65  | 86  | 92  |
| DAPK3               | DAPK3    | 88  | 90  | 85  | 62   | 100 | 88   | 80  | 85  | 96  |
| DCAMKL1             | DCLK1    | 78  | 92  | 90  | 100  | 81  | 88   | 90  | 77  | 94  |
| DCAMKL2             | DCLK2    | 100 | 100 | 94  | 99   | 89  | 99   | 100 | 98  | 75  |
| DCAMKL3             | DCLK3    | 78  | 36  | 45  | 54   | 100 | 39   | 94  | 90  | 100 |
| DDR1                | DDR1     | 88  | 43  | 24  | 78   | 100 | 3.7  | 100 | 89  | 66  |
| DDR2                | DDR2     | 100 | 76  | 50  | 67   | 94  | 0.85 | 100 | 100 | 89  |
| DLK                 | MAP3K12  | 97  | 99  | 100 | 66   | 11  | 71   | 20  | 48  | 71  |
| DMPK                | DMPK     | 66  | 72  | 100 | 84   | 98  | 100  | 91  | 92  | 89  |
| DMPK2               | CDC42BPG | 93  | 97  | 93  | 92   | 100 | 68   | 100 | 95  | 81  |
| DRAK1               | STK17A   | 89  | 92  | 78  | 25   | 100 | 95   | 83  | 100 | 100 |
| DRAK2               | STK17B   | 93  | 85  | 74  | 23   | 100 | 86   | 73  | 85  | 100 |
| DYRK1A              | DYRK1A   | 89  | 80  | 80  | 70   | 80  | 92   | 100 | 92  | 100 |
| DYRK1B              | DYRK1B   | 85  | 85  | 84  | 95   | 87  | 72   | 84  | 89  | 68  |
| DYRK2               | DYRK2    | 83  | 81  | 79  | 77   | 96  | 100  | 100 | 100 | 94  |
| EGFR                | EGFR     | 75  | 84  | 82  | 100  | 100 | 67   | 100 | 97  | 97  |
| EGFR(E746-A750del)  | EGFR     | 75  | 57  | 60  | 89   | 86  | 45   | 52  | 69  | 56  |
| EGFR(G719C)         | EGFR     | 91  | 79  | 65  | 60   | 75  | 57   | 78  | 81  | 37  |
| EGFR(G719S)         | EGFR     | 68  | 38  | 66  | 76   | 84  | 53   | 82  | 80  | 95  |

|                           |         |     |     |     |     |     |     |     |     |     |
|---------------------------|---------|-----|-----|-----|-----|-----|-----|-----|-----|-----|
| EGFR(L747-E749del, A750P) | EGFR    | 66  | 78  | 63  | 82  | 94  | 61  | 100 | 100 | 86  |
| EGFR(L747-S752del, P753S) | EGFR    | 93  | 100 | 78  | 100 | 94  | 59  | 69  | 83  | 52  |
| EGFR(L747-T751del,Sins)   | EGFR    | 90  | 56  | 52  | 80  | 85  | 50  | 97  | 72  | 99  |
| EGFR(L858R)               | EGFR    | 68  | 73  | 62  | 78  | 97  | 47  | 91  | 93  | 86  |
| EGFR(L858R,T790M)         | EGFR    | 95  | 77  | 81  | 51  | 56  | 37  | 90  | 89  | 100 |
| EGFR(L861Q)               | EGFR    | 27  | 67  | 57  | 92  | 72  | 52  | 80  | 74  | 84  |
| EGFR(S752-I759del)        | EGFR    | 87  | 67  | 69  | 84  | 76  | 36  | 77  | 46  | 94  |
| EGFR(T790M)               | EGFR    | 98  | 100 | 98  | 64  | 64  | 44  | 86  | 73  | 81  |
| EIF2AK1                   | EIF2AK1 | 77  | 80  | 67  | 83  | 91  | 100 | 100 | 100 | 100 |
| EPHA1                     | EPHA1   | 83  | 91  | 83  | 24  | 98  | 40  | 100 | 100 | 98  |
| EPHA2                     | EPHA2   | 84  | 96  | 97  | 67  | 96  | 74  | 93  | 100 | 100 |
| EPHA3                     | EPHA3   | 92  | 88  | 91  | 39  | 99  | 93  | 98  | 88  | 86  |
| EPHA4                     | EPHA4   | 76  | 96  | 91  | 83  | 100 | 97  | 95  | 93  | 98  |
| EPHA5                     | EPHA5   | 89  | 92  | 89  | 65  | 100 | 76  | 77  | 78  | 99  |
| EPHA6                     | EPHA6   | 76  | 97  | 91  | 59  | 100 | 79  | 100 | 91  | 96  |
| EPHA7                     | EPHA7   | 99  | 100 | 97  | 40  | 100 | 92  | 94  | 94  | 100 |
| EPHA8                     | EPHA8   | 91  | 95  | 91  | 93  | 100 | 49  | 98  | 97  | 100 |
| EPHB1                     | EPHB1   | 84  | 69  | 71  | 28  | 100 | 90  | 95  | 90  | 96  |
| EPHB2                     | EPHB2   | 77  | 80  | 82  | 56  | 81  | 61  | 53  | 66  | 97  |
| EPHB3                     | EPHB3   | 81  | 100 | 87  | 94  | 100 | 87  | 98  | 91  | 97  |
| EPHB4                     | EPHB4   | 81  | 94  | 75  | 57  | 100 | 96  | 100 | 100 | 100 |
| EPHB6                     | EPHB6   | 70  | 42  | 33  | 6.6 | 49  | 4.8 | 100 | 93  | 78  |
| ERBB2                     | ERBB2   | 63  | 34  | 2.2 | 87  | 92  | 18  | 100 | 100 | 44  |
| ERBB3                     | ERBB3   | 100 | 100 | 87  | 45  | 78  | 53  | 100 | 96  | 100 |
| ERBB4                     | ERBB4   | 95  | 96  | 93  | 77  | 100 | 74  | 74  | 95  | 100 |
| ERK1                      | MAPK3   | 92  | 93  | 80  | 89  | 100 | 65  | 86  | 97  | 100 |
| ERK2                      | MAPK1   | 88  | 94  | 81  | 97  | 100 | 77  | 88  | 90  | 94  |
| ERK3                      | MAPK6   | 89  | 96  | 91  | 97  | 100 | 98  | 96  | 95  | 87  |
| ERK4                      | MAPK4   | 83  | 92  | 89  | 89  | 100 | 100 | 97  | 98  | 100 |
| ERK5                      | MAPK7   | 92  | 100 | 89  | 98  | 100 | 98  | 91  | 100 | 87  |
| ERK8                      | MAPK15  | 82  | 68  | 90  | 65  | 98  | 83  | 99  | 87  | 78  |
| ERN1                      | ERN1    | 80  | 87  | 86  | 59  | 70  | 91  | 100 | 100 | 100 |
| FAK                       | PTK2    | 94  | 98  | 93  | 92  | 96  | 60  | 60  | 74  | 97  |
| FER                       | FER     | 79  | 98  | 91  | 91  | 97  | 91  | 98  | 96  | 91  |
| FES                       | FES     | 57  | 93  | 78  | 80  | 100 | 93  | 100 | 98  | 93  |
| FGFR1                     | FGFR1   | 85  | 72  | 39  | 11  | 74  | 10  | 77  | 90  | 97  |
| FGFR2                     | FGFR2   | 82  | 73  | 38  | 16  | 79  | 29  | 98  | 98  | 96  |
| FGFR3                     | FGFR3   | 91  | 91  | 60  | 18  | 84  | 36  | 84  | 100 | 84  |
| FGFR3(G697C)              | FGFR3   | 76  | 91  | 53  | 11  | 88  | 36  | 79  | 94  | 97  |
| FGFR4                     | FGFR4   | 89  | 82  | 49  | 37  | 100 | 37  | 70  | 92  | 97  |
| FGR                       | FGR     | 77  | 78  | 68  | 28  | 96  | 12  | 91  | 91  | 100 |
| FLT1                      | FLT1    | 98  | 53  | 67  | 34  | 95  | 24  | 87  | 96  | 94  |
| FLT3                      | FLT3    | 97  | 46  | 45  | 4.7 | 72  | 2.1 | 77  | 77  | 64  |
| FLT3(D835H)               | FLT3    | 80  | 64  | 61  | 7   | 39  | 15  | 94  | 82  | 76  |
| FLT3(D835V)               | FLT3    | 100 | 47  | 41  | 2.1 | 10  | 22  | 100 | 100 | 55  |
| FLT3(D835Y)               | FLT3    | 60  | 46  | 40  | 3.8 | 49  | 32  | 88  | 70  | 82  |

|                              |         |     |     |     |      |      |     |     |     |     |
|------------------------------|---------|-----|-----|-----|------|------|-----|-----|-----|-----|
| FLT3(ITD)                    | FLT3    | 89  | 34  | 58  | 9.3  | 56   | 23  | 82  | 92  | 98  |
| FLT3(ITD,D835V)              | FLT3    | 100 | 94  | 71  | 0.8  | 20   | 80  | 100 | 100 | 100 |
| FLT3(ITD,F691L)              | FLT3    | 96  | 92  | 84  | 2    | 25   | 100 | 100 | 100 | 76  |
| FLT3(K663Q)                  | FLT3    | 90  | 43  | 45  | 6.5  | 80   | 13  | 74  | 87  | 96  |
| FLT3(N841I)                  | FLT3    | 99  | 95  | 56  | 0    | 71   | 21  | 72  | 86  | 82  |
| FLT3(R834Q)                  | FLT3    | 88  | 75  | 79  | 27   | 81   | 53  | 88  | 92  | 100 |
| FLT3-autoinhibited           | FLT3    | 64  | 47  | 46  | 26   | 72   | 5.6 | 100 | 94  | 95  |
| FLT4                         | FLT4    | 51  | 77  | 89  | 1.1  | 76   | 86  | 89  | 100 | 91  |
| FRK                          | FRK     | 80  | 57  | 58  | 78   | 95   | 41  | 71  | 100 | 92  |
| FYN                          | FYN     | 57  | 72  | 44  | 38   | 84   | 17  | 77  | 100 | 97  |
| GAK                          | GAK     | 19  | 7.8 | 6.2 | 9.6  | 24   | 4.5 | 86  | 54  | 20  |
| GCN2(Kin.Dom.2,S808G)        | EIF2AK4 | 99  | 88  | 81  | 100  | 100  | 96  | 98  | 100 | 100 |
| GRK1                         | GRK1    | 91  | 93  | 89  | 60   | 69   | 72  | 92  | 84  | 96  |
| GRK2                         | ADRBK1  | 89  | 93  | 100 | 40   | 100  | 100 | 97  | 100 | 99  |
| GRK3                         | ADRBK2  | 100 | 100 | 100 | 96   | 81   | 82  | 92  | 81  | 95  |
| GRK4                         | GRK4    | 78  | 80  | 100 | 83   | 67   | 88  | 87  | 100 | 71  |
| GRK7                         | GRK7    | 88  | 92  | 82  | 51   | 62   | 77  | 100 | 100 | 98  |
| GSK3A                        | GSK3A   | 100 | 85  | 97  | 87   | 60   | 76  | 92  | 70  | 93  |
| GSK3B                        | GSK3B   | 100 | 100 | 97  | 92   | 83   | 100 | 100 | 92  | 100 |
| HASPIN                       | GSG2    | 73  | 53  | 11  | 33   | 48   | 13  | 100 | 100 | 97  |
| HCK                          | HCK     | 48  | 41  | 33  | 10   | 89   | 9.6 | 96  | 86  | 82  |
| HIPK1                        | HIPK1   | 76  | 62  | 59  | 58   | 83   | 43  | 78  | 59  | 82  |
| HIPK2                        | HIPK2   | 100 | 100 | 100 | 84   | 72   | 73  | 100 | 100 | 100 |
| HIPK3                        | HIPK3   | 100 | 97  | 92  | 91   | 78   | 59  | 100 | 88  | 100 |
| HIPK4                        | HIPK4   | 76  | 64  | 51  | 89   | 96   | 38  | 69  | 82  | 83  |
| HPK1                         | MAP4K1  | 98  | 93  | 60  | 38   | 99   | 68  | 98  | 100 | 100 |
| HUNK                         | HUNK    | 96  | 96  | 81  | 100  | 100  | 100 | 100 | 100 | 100 |
| ICK                          | ICK     | 100 | 100 | 98  | 85   | 71   | 100 | 100 | 100 | 92  |
| IGF1R                        | IGF1R   | 77  | 86  | 86  | 55   | 100  | 81  | 91  | 100 | 100 |
| IKK-alpha                    | CHUK    | 96  | 95  | 89  | 27   | 82   | 78  | 96  | 89  | 98  |
| IKK-beta                     | IKBKB   | 97  | 92  | 89  | 26   | 55   | 82  | 96  | 97  | 97  |
| IKK-epsilon                  | IKBKE   | 80  | 72  | 53  | 32   | 61   | 51  | 100 | 100 | 100 |
| INSR                         | INSR    | 80  | 84  | 98  | 24   | 69   | 27  | 89  | 74  | 80  |
| INSRR                        | INSRR   | 100 | 84  | 99  | 58   | 88   | 64  | 100 | 100 | 100 |
| IRAK1                        | IRAK1   | 100 | 97  | 88  | 20   | 66   | 36  | 100 | 83  | 100 |
| IRAK3                        | IRAK3   | 96  | 100 | 88  | 65   | 100  | 55  | 91  | 83  | 77  |
| IRAK4                        | IRAK4   | 100 | 99  | 90  | 28   | 67   | 84  | 100 | 93  | 97  |
| ITK                          | ITK     | 95  | 74  | 86  | 52   | 93   | 90  | 94  | 89  | 98  |
| JAK1(JH1domain-catalytic)    | JAK1    | 92  | 91  | 86  | 74   | 77   | 100 | 100 | 100 | 93  |
| JAK1(JH2domain-pseudokinase) | JAK1    | 13  | 12  | 20  | 0.2  | 0.25 | 45  | 1.9 | 3.2 | 15  |
| JAK2(JH1domain-catalytic)    | JAK2    | 94  | 94  | 87  | 0.95 | 15   | 76  | 79  | 74  | 93  |
| JAK3(JH1domain-catalytic)    | JAK3    | 96  | 88  | 99  | 5.3  | 1    | 87  | 23  | 17  | 84  |
| JNK1                         | MAPK8   | 100 | 85  | 47  | 17   | 57   | 66  | 86  | 89  | 89  |
| JNK2                         | MAPK9   | 74  | 60  | 17  | 64   | 57   | 52  | 97  | 95  | 91  |
| JNK3                         | MAPK10  | 81  | 77  | 31  | 36   | 60   | 67  | 100 | 100 | 96  |
| KIT                          | KIT     | 98  | 93  | 67  | 7.6  | 76   | 3.2 | 91  | 93  | 62  |

|                   |          |     |     |     |     |     |      |     |     |     |
|-------------------|----------|-----|-----|-----|-----|-----|------|-----|-----|-----|
| KIT(A829P)        | KIT      | 96  | 75  | 50  | 20  | 35  | 36   | 100 | 100 | 100 |
| KIT(D816H)        | KIT      | 100 | 100 | 84  | 11  | 60  | 28   | 86  | 89  | 100 |
| KIT(D816V)        | KIT      | 94  | 61  | 40  | 1.4 | 44  | 9.8  | 81  | 83  | 93  |
| KIT(L576P)        | KIT      | 100 | 95  | 64  | 1.2 | 76  | 4.9  | 92  | 99  | 59  |
| KIT(V559D)        | KIT      | 100 | 96  | 59  | 5.1 | 59  | 1.5  | 81  | 92  | 57  |
| KIT(V559D,T670I)  | KIT      | 100 | 100 | 74  | 9.2 | 100 | 38   | 100 | 100 | 79  |
| KIT(V559D,V654A)  | KIT      | 96  | 91  | 94  | 25  | 95  | 57   | 71  | 78  | 100 |
| KIT-autoinhibited | KIT      | 95  | 81  | 70  | 15  | 81  | 12   | 100 | 88  | 90  |
| LATS1             | LATS1    | 56  | 91  | 76  | 100 | 100 | 90   | 100 | 99  | 100 |
| LATS2             | LATS2    | 79  | 76  | 82  | 74  | 67  | 71   | 100 | 92  | 100 |
| LCK               | LCK      | 76  | 29  | 15  | 21  | 54  | 2.8  | 87  | 78  | 74  |
| LIMK1             | LIMK1    | 99  | 94  | 99  | 75  | 99  | 53   | 100 | 100 | 96  |
| LIMK2             | LIMK2    | 89  | 96  | 87  | 87  | 97  | 79   | 97  | 89  | 80  |
| LKB1              | STK11    | 73  | 89  | 87  | 90  | 91  | 81   | 100 | 97  | 64  |
| LOK               | STK10    | 80  | 70  | 68  | 4.3 | 100 | 35   | 99  | 100 | 97  |
| LRRK2             | LRRK2    | 100 | 94  | 0   | 43  | 67  | 57   | 89  | 73  | 87  |
| LRRK2(G2019S)     | LRRK2    | 100 | 100 | 100 | 73  | 55  | 100  | 100 | 100 | 100 |
| LTK               | LTK      | 75  | 79  | 75  | 54  | 100 | 44   | 88  | 89  | 100 |
| LYN               | LYN      | 74  | 73  | 71  | 53  | 80  | 32   | 59  | 74  | 95  |
| LZK               | MAP3K13  | 100 | 100 | 100 | 100 | 100 | 82   | 82  | 92  | 93  |
| MAK               | MAK      | 97  | 76  | 52  | 95  | 100 | 70   | 95  | 91  | 100 |
| MAP3K1            | MAP3K1   | 98  | 100 | 85  | 47  | 81  | 89   | 100 | 96  | 100 |
| MAP3K15           | MAP3K15  | 100 | 100 | 88  | 39  | 60  | 90   | 100 | 96  | 100 |
| MAP3K2            | MAP3K2   | 95  | 86  | 60  | 2.3 | 33  | 22   | 100 | 79  | 100 |
| MAP3K3            | MAP3K3   | 84  | 66  | 51  | 4.2 | 45  | 11   | 92  | 77  | 87  |
| MAP3K4            | MAP3K4   | 59  | 99  | 75  | 69  | 95  | 100  | 100 | 100 | 87  |
| MAP4K2            | MAP4K2   | 88  | 94  | 93  | 21  | 66  | 62   | 100 | 100 | 100 |
| MAP4K3            | MAP4K3   | 99  | 100 | 100 | 40  | 98  | 62   | 95  | 87  | 97  |
| MAP4K4            | MAP4K4   | 89  | 97  | 99  | 71  | 100 | 84   | 85  | 95  | 100 |
| MAP4K5            | MAP4K5   | 93  | 100 | 100 | 81  | 99  | 79   | 93  | 97  | 92  |
| MAPKAPK2          | MAPKAPK2 | 93  | 100 | 100 | 100 | 100 | 88   | 99  | 100 | 95  |
| MAPKAPK5          | MAPKAPK5 | 89  | 87  | 80  | 95  | 87  | 93   | 100 | 96  | 100 |
| MARK1             | MARK1    | 92  | 96  | 91  | 77  | 91  | 57   | 56  | 65  | 100 |
| MARK2             | MARK2    | 97  | 100 | 88  | 44  | 79  | 43   | 62  | 75  | 100 |
| MARK3             | MARK3    | 93  | 95  | 100 | 89  | 100 | 87   | 96  | 100 | 100 |
| MARK4             | MARK4    | 79  | 88  | 84  | 67  | 96  | 69   | 80  | 80  | 99  |
| MAST1             | MAST1    | 100 | 100 | 100 | 94  | 63  | 55   | 100 | 95  | 68  |
| MEK1              | MAP2K1   | 82  | 67  | 26  | 28  | 73  | 0.2  | 99  | 85  | 99  |
| MEK2              | MAP2K2   | 67  | 72  | 35  | 35  | 84  | 0.55 | 87  | 89  | 100 |
| MEK3              | MAP2K3   | 86  | 78  | 56  | 28  | 69  | 42   | 100 | 90  | 96  |
| MEK4              | MAP2K4   | 74  | 66  | 30  | 31  | 59  | 38   | 100 | 96  | 91  |
| MEK5              | MAP2K5   | 80  | 61  | 37  | 3.8 | 36  | 0.2  | 93  | 79  | 83  |
| MEK6              | MAP2K6   | 81  | 100 | 85  | 67  | 87  | 65   | 77  | 87  | 91  |
| MELK              | MELK     | 91  | 85  | 66  | 78  | 100 | 24   | 81  | 96  | 100 |
| MERTK             | MERTK    | 78  | 53  | 60  | 15  | 93  | 65   | 91  | 96  | 71  |
| MET               | MET      | 93  | 87  | 76  | 47  | 100 | 55   | 83  | 98  | 100 |



|             |          |     |     |     |     |     |     |     |     |     |
|-------------|----------|-----|-----|-----|-----|-----|-----|-----|-----|-----|
| MET(M1250T) | MET      | 100 | 100 | 100 | 84  | 100 | 72  | 99  | 100 | 87  |
| MET(Y1235D) | MET      | 82  | 77  | 72  | 59  | 94  | 40  | 77  | 83  | 94  |
| MINK        | MINK1    | 98  | 90  | 87  | 37  | 57  | 55  | 96  | 89  | 80  |
| MKK7        | MAP2K7   | 100 | 100 | 100 | 96  | 68  | 100 | 100 | 100 | 100 |
| MKNK1       | MKNK1    | 86  | 94  | 93  | 88  | 72  | 100 | 100 | 100 | 100 |
| MKNK2       | MKNK2    | 73  | 64  | 55  | 54  | 66  | 18  | 95  | 92  | 75  |
| MLCK        | MYLK3    | 95  | 95  | 86  | 64  | 100 | 59  | 99  | 100 | 100 |
| MLK1        | MAP3K9   | 95  | 89  | 81  | 12  | 96  | 59  | 72  | 92  | 100 |
| MLK2        | MAP3K10  | 82  | 49  | 57  | 53  | 76  | 68  | 86  | 77  | 89  |
| MLK3        | MAP3K11  | 77  | 92  | 71  | 21  | 89  | 46  | 74  | 83  | 98  |
| MRCKA       | CDC42BPA | 85  | 94  | 78  | 82  | 100 | 68  | 84  | 91  | 98  |
| MRCKB       | CDC42BPB | 93  | 91  | 99  | 100 | 95  | 95  | 100 | 100 | 87  |
| MST1        | STK4     | 81  | 87  | 87  | 64  | 91  | 54  | 96  | 94  | 100 |
| MST1R       | MST1R    | 90  | 88  | 70  | 79  | 100 | 80  | 97  | 81  | 94  |
| MST2        | STK3     | 100 | 100 | 78  | 66  | 73  | 71  | 90  | 85  | 78  |
| MST3        | STK24    | 100 | 82  | 70  | 47  | 81  | 44  | 74  | 83  | 85  |
| MST4        | MST4     | 100 | 100 | 87  | 64  | 71  | 52  | 100 | 95  | 100 |
| MTOR        | MTOR     | 0   | 0   | 0   | 0   | 0   | 0   | 0   | 0   | 0   |
| MUSK        | MUSK     | 100 | 87  | 100 | 96  | 99  | 100 | 100 | 100 | 100 |
| MYLK        | MYLK     | 74  | 59  | 60  | 48  | 77  | 30  | 94  | 98  | 90  |
| MYLK2       | MYLK2    | 100 | 41  | 96  | 97  | 100 | 93  | 81  | 96  | 100 |
| MYLK4       | MYLK4    | 100 | 100 | 86  | 62  | 78  | 69  | 91  | 93  | 98  |
| MYO3A       | MYO3A    | 94  | 94  | 88  | 93  | 93  | 31  | 88  | 92  | 92  |
| MYO3B       | MYO3B    | 59  | 89  | 70  | 100 | 100 | 85  | 96  | 97  | 100 |
| NDR1        | STK38    | 90  | 94  | 77  | 74  | 75  | 39  | 78  | 86  | 90  |
| NDR2        | STK38L   | 94  | 94  | 91  | 63  | 100 | 45  | 98  | 90  | 100 |
| NEK1        | NEK1     | 84  | 89  | 81  | 81  | 100 | 95  | 61  | 100 | 84  |
| NEK10       | NEK10    | 92  | 74  | 77  | 1.6 | 50  | 100 | 100 | 100 | 100 |
| NEK11       | NEK11    | 100 | 99  | 100 | 92  | 87  | 92  | 85  | 100 | 100 |
| NEK2        | NEK2     | 88  | 94  | 80  | 93  | 88  | 81  | 94  | 92  | 90  |
| NEK3        | NEK3     | 87  | 81  | 80  | 75  | 67  | 67  | 93  | 75  | 83  |
| NEK4        | NEK4     | 99  | 94  | 82  | 73  | 86  | 93  | 100 | 94  | 98  |
| NEK5        | NEK5     | 85  | 90  | 82  | 74  | 94  | 100 | 100 | 89  | 76  |
| NEK6        | NEK6     | 97  | 93  | 97  | 96  | 100 | 79  | 63  | 76  | 95  |
| NEK7        | NEK7     | 77  | 86  | 71  | 75  | 100 | 87  | 91  | 89  | 100 |
| NEK9        | NEK9     | 93  | 99  | 82  | 87  | 97  | 75  | 84  | 78  | 99  |
| NIK         | MAP3K14  | 89  | 80  | 93  | 25  | 81  | 85  | 76  | 81  | 100 |
| NIM1        | MGC42105 | 99  | 100 | 91  | 88  | 77  | 80  | 100 | 96  | 94  |
| NLK         | NLK      | 57  | 44  | 18  | 79  | 98  | 27  | 100 | 97  | 83  |
| OSR1        | OXR1     | 71  | 69  | 72  | 42  | 83  | 100 | 100 | 100 | 100 |
| p38-alpha   | MAPK14   | 97  | 100 | 84  | 96  | 93  | 82  | 86  | 99  | 100 |
| p38-beta    | MAPK11   | 70  | 83  | 82  | 83  | 99  | 98  | 78  | 100 | 100 |
| p38-delta   | MAPK13   | 100 | 85  | 80  | 96  | 100 | 64  | 100 | 73  | 92  |
| p38-gamma   | MAPK12   | 95  | 41  | 71  | 79  | 96  | 62  | 100 | 76  | 100 |
| PAK1        | PAK1     | 83  | 90  | 87  | 76  | 88  | 53  | 86  | 81  | 96  |
| PAK2        | PAK2     | 83  | 94  | 82  | 70  | 54  | 0   | 69  | 48  | 94  |

|                       |             |     |      |     |     |      |      |     |      |     |
|-----------------------|-------------|-----|------|-----|-----|------|------|-----|------|-----|
| PAK3                  | PAK3        | 76  | 100  | 92  | 86  | 100  | 60   | 92  | 93   | 99  |
| PAK4                  | PAK4        | 92  | 88   | 72  | 10  | 93   | 71   | 71  | 77   | 92  |
| PAK6                  | PAK6        | 91  | 91   | 84  | 17  | 94   | 72   | 81  | 89   | 83  |
| PAK7                  | PAK7        | 91  | 91   | 86  | 12  | 98   | 94   | 95  | 97   | 93  |
| PCTK1                 | CDK16       | 92  | 96   | 100 | 100 | 77   | 100  | 100 | 96   | 100 |
| PCTK2                 | CDK17       | 87  | 100  | 83  | 94  | 100  | 100  | 100 | 100  | 96  |
| PCTK3                 | CDK18       | 96  | 100  | 92  | 100 | 94   | 96   | 93  | 89   | 71  |
| PDGFRA                | PDGFRA      | 61  | 43   | 23  | 15  | 40   | 12   | 100 | 95   | 99  |
| PDGFRB                | PDGFRB      | 98  | 34   | 33  | 8.3 | 50   | 0.8  | 94  | 85   | 44  |
| PDPK1                 | PDPK1       | 89  | 97   | 87  | 49  | 94   | 58   | 92  | 72   | 89  |
| PFCDPK1(P.falciparum) | CDPK1       | 93  | 68   | 29  | 46  | 88   | 2.4  | 97  | 87   | 92  |
| PFPK5(P.falciparum)   | MAL13P1.279 | 99  | 96   | 100 | 91  | 66   | 100  | 100 | 100  | 100 |
| PFTAIRE2              | CDK15       | 79  | 98   | 80  | 96  | 94   | 88   | 97  | 82   | 97  |
| PFTK1                 | CDK14       | 99  | 100  | 100 | 97  | 90   | 84   | 96  | 90   | 71  |
| PHKG1                 | PHKG1       | 96  | 100  | 94  | 89  | 100  | 86   | 87  | 100  | 97  |
| PHKG2                 | PHKG2       | 97  | 88   | 73  | 72  | 96   | 62   | 76  | 86   | 80  |
| PIK3C2B               | PIK3C2B     | 35  | 44   | 13  | 49  | 80   | 47   | 97  | 70   | 35  |
| PIK3C2G               | PIK3C2G     | 2.4 | 0.7  | 2.7 | 16  | 66   | 41   | 100 | 20   | 7.4 |
| PIK3CA                | PIK3CA      | 47  | 28   | 2.6 | 37  | 86   | 0    | 83  | 4.5  | 55  |
| PIK3CA(C420R)         | PIK3CA      | 40  | 28   | 1.9 | 24  | 83   | 0    | 94  | 6.6  | 73  |
| PIK3CA(E542K)         | PIK3CA      | 50  | 31   | 1.4 | 29  | 71   | 0.05 | 86  | 6.9  | 60  |
| PIK3CA(E545A)         | PIK3CA      | 36  | 26   | 1.6 | 23  | 100  | 0    | 81  | 5.4  | 79  |
| PIK3CA(E545K)         | PIK3CA      | 33  | 21   | 1.5 | 24  | 83   | 0    | 65  | 6.4  | 66  |
| PIK3CA(H1047L)        | PIK3CA      | 27  | 10   | 0   | 7.7 | 51   | 0    | 100 | 0    | 27  |
| PIK3CA(H1047Y)        | PIK3CA      | 48  | 18   | 4.6 | 27  | 100  | 0    | 79  | 1.4  | 82  |
| PIK3CA(I800L)         | PIK3CA      | 26  | 4.2  | 0   | 6.5 | 20   | 0    | 47  | 2.4  | 41  |
| PIK3CA(M1043I)        | PIK3CA      | 44  | 36   | 2.5 | 21  | 74   | 0    | 100 | 0.7  | 40  |
| PIK3CA(Q546K)         | PIK3CA      | 41  | 27   | 1.8 | 31  | 68   | 0    | 77  | 7.7  | 78  |
| PIK3CB                | PIK3CB      | 47  | 39   | 3.1 | 43  | 66   | 0.5  | 100 | 9.6  | 73  |
| PIK3CD                | PIK3CD      | 45  | 34   | 13  | 53  | 88   | 1.2  | 100 | 12   | 93  |
| PIK3CG                | PIK3CG      | 2.3 | 0.75 | 0   | 0   | 28   | 0    | 75  | 0.05 | 3.7 |
| PIK4CB                | PI4KB       | 2.8 | 2.2  | 2.3 | 1.6 | 0.55 | 5.5  | 25  | 3.8  | 1.3 |
| PIKFYVE               | PIKFYVE     | 83  | 68   | 64  | 0.3 | 84   | 88   | 100 | 100  | 80  |
| PIM1                  | PIM1        | 100 | 100  | 94  | 100 | 99   | 93   | 80  | 85   | 91  |
| PIM2                  | PIM2        | 99  | 99   | 76  | 93  | 100  | 92   | 100 | 92   | 97  |
| PIM3                  | PIM3        | 93  | 95   | 75  | 76  | 96   | 85   | 92  | 81   | 91  |
| PIP5K1A               | PIP5K1A     | 100 | 100  | 100 | 77  | 61   | 69   | 90  | 74   | 92  |
| PIP5K1C               | PIP5K1C     | 100 | 100  | 72  | 62  | 32   | 72   | 87  | 87   | 70  |
| PIP5K2B               | PIP4K2B     | 68  | 99   | 94  | 91  | 73   | 100  | 100 | 100  | 96  |
| PIP5K2C               | PIP4K2C     | 38  | 27   | 20  | 5.9 | 62   | 62   | 100 | 100  | 30  |
| PKAC-alpha            | PRKACA      | 96  | 100  | 100 | 100 | 99   | 19   | 94  | 86   | 100 |
| PKAC-beta             | PRKACB      | 99  | 54   | 89  | 100 | 100  | 21   | 100 | 91   | 91  |
| PKMYT1                | PKMYT1      | 89  | 78   | 91  | 90  | 93   | 88   | 84  | 95   | 100 |
| PKN1                  | PKN1        | 97  | 100  | 96  | 85  | 98   | 85   | 100 | 95   | 81  |
| PKN2                  | PKN2        | 100 | 89   | 92  | 66  | 93   | 99   | 87  | 91   | 87  |
| PKNB(M.tuberculosis)  | pknB        | 99  | 87   | 93  | 9.3 | 70   | 28   | 90  | 71   | 78  |

|                               |          |     |     |     |     |     |     |     |     |     |
|-------------------------------|----------|-----|-----|-----|-----|-----|-----|-----|-----|-----|
| PLK1                          | PLK1     | 92  | 94  | 92  | 82  | 87  | 95  | 100 | 100 | 100 |
| PLK2                          | PLK2     | 71  | 79  | 73  | 31  | 100 | 97  | 100 | 100 | 100 |
| PLK3                          | PLK3     | 87  | 97  | 96  | 88  | 85  | 75  | 91  | 81  | 100 |
| PLK4                          | PLK4     | 100 | 100 | 96  | 25  | 84  | 30  | 68  | 81  | 91  |
| PRKCD                         | PRKCD    | 84  | 83  | 88  | 76  | 100 | 68  | 91  | 99  | 100 |
| PRKCE                         | PRKCE    | 93  | 85  | 77  | 73  | 91  | 35  | 100 | 100 | 79  |
| PRKCH                         | PRKCH    | 77  | 97  | 76  | 70  | 100 | 46  | 97  | 93  | 100 |
| PRKCI                         | PRKCI    | 83  | 48  | 54  | 68  | 92  | 36  | 88  | 48  | 88  |
| PRKCQ                         | PRKCQ    | 97  | 100 | 94  | 93  | 100 | 85  | 96  | 57  | 71  |
| PRKD1                         | PRKD1    | 97  | 43  | 33  | 100 | 100 | 70  | 91  | 100 | 91  |
| PRKD2                         | PRKD2    | 98  | 88  | 55  | 100 | 100 | 84  | 100 | 95  | 98  |
| PRKD3                         | PRKD3    | 100 | 78  | 43  | 100 | 100 | 84  | 96  | 83  | 97  |
| PRKG1                         | PRKG1    | 88  | 52  | 95  | 100 | 98  | 95  | 89  | 85  | 91  |
| PRKG2                         | PRKG2    | 81  | 64  | 71  | 38  | 83  | 88  | 100 | 85  | 100 |
| PRKR                          | EIF2AK2  | 81  | 65  | 70  | 57  | 87  | 50  | 64  | 85  | 94  |
| PRKX                          | PRKX     | 100 | 95  | 92  | 98  | 100 | 93  | 99  | 87  | 84  |
| PRP4                          | PRPF4B   | 100 | 88  | 83  | 77  | 100 | 96  | 98  | 98  | 79  |
| PYK2                          | PTK2B    | 71  | 65  | 73  | 62  | 100 | 81  | 86  | 82  | 94  |
| QSK                           | KIAA0999 | 100 | 99  | 92  | 90  | 74  | 79  | 100 | 99  | 100 |
| RAF1                          | RAF1     | 77  | 66  | 57  | 77  | 100 | 59  | 61  | 81  | 100 |
| RET                           | RET      | 92  | 88  | 53  | 1.9 | 61  | 3.8 | 70  | 78  | 90  |
| RET(M918T)                    | RET      | 83  | 37  | 46  | 1.2 | 61  | 3.7 | 100 | 95  | 80  |
| RET(V804L)                    | RET      | 96  | 45  | 92  | 19  | 67  | 91  | 99  | 99  | 83  |
| RET(V804M)                    | RET      | 98  | 94  | 86  | 22  | 74  | 61  | 88  | 83  | 94  |
| RIOK1                         | RIOK1    | 93  | 49  | 77  | 32  | 25  | 80  | 75  | 72  | 72  |
| RIOK2                         | RIOK2    | 100 | 100 | 82  | 55  | 75  | 90  | 100 | 100 | 100 |
| RIOK3                         | RIOK3    | 100 | 79  | 89  | 39  | 16  | 71  | 72  | 74  | 82  |
| RIPK1                         | RIPK1    | 94  | 94  | 94  | 90  | 96  | 87  | 92  | 92  | 90  |
| RIPK2                         | RIPK2    | 62  | 17  | 11  | 76  | 79  | 4.3 | 72  | 92  | 53  |
| RIPK4                         | RIPK4    | 100 | 98  | 90  | 4.7 | 92  | 72  | 100 | 100 | 100 |
| RIPK5                         | DSTYK    | 56  | 70  | 57  | 27  | 90  | 61  | 100 | 96  | 66  |
| ROCK1                         | ROCK1    | 100 | 95  | 88  | 61  | 79  | 18  | 89  | 100 | 99  |
| ROCK2                         | ROCK2    | 87  | 82  | 84  | 69  | 84  | 22  | 99  | 100 | 95  |
| ROS1                          | ROS1     | 86  | 91  | 84  | 83  | 95  | 48  | 82  | 79  | 97  |
| RPS6KA4(Kin.Dom.1-N-terminal) | RPS6KA4  | 97  | 42  | 93  | 100 | 100 | 77  | 89  | 85  | 82  |
| RPS6KA4(Kin.Dom.2-C-terminal) | RPS6KA4  | 87  | 84  | 79  | 65  | 83  | 93  | 100 | 87  | 100 |
| RPS6KA5(Kin.Dom.1-N-terminal) | RPS6KA5  | 75  | 100 | 86  | 100 | 100 | 73  | 96  | 100 | 100 |
| RPS6KA5(Kin.Dom.2-C-terminal) | RPS6KA5  | 92  | 90  | 87  | 66  | 94  | 100 | 100 | 94  | 94  |
| RSK1(Kin.Dom.1-N-terminal)    | RPS6KA1  | 100 | 100 | 70  | 17  | 84  | 76  | 100 | 97  | 77  |
| RSK1(Kin.Dom.2-C-terminal)    | RPS6KA1  | 90  | 72  | 38  | 63  | 98  | 42  | 94  | 84  | 77  |
| RSK2(Kin.Dom.1-N-terminal)    | RPS6KA3  | 84  | 81  | 72  | 14  | 54  | 70  | 99  | 90  | 100 |
| RSK2(Kin.Dom.2-C-terminal)    | RPS6KA3  | 85  | 90  | 29  | 78  | 100 | 100 | 100 | 100 | 100 |
| RSK3(Kin.Dom.1-N-terminal)    | RPS6KA2  | 90  | 98  | 93  | 81  | 90  | 96  | 100 | 74  | 81  |
| RSK3(Kin.Dom.2-C-terminal)    | RPS6KA2  | 100 | 100 | 100 | 100 | 100 | 69  | 73  | 70  | 89  |
| RSK4(Kin.Dom.1-N-terminal)    | RPS6KA6  | 78  | 79  | 53  | 7.8 | 23  | 99  | 100 | 78  | 100 |
| RSK4(Kin.Dom.2-C-terminal)    | RPS6KA6  | 90  | 46  | 6.7 | 62  | 91  | 7   | 72  | 75  | 68  |

|        |         |     |     |     |     |     |     |     |     |     |
|--------|---------|-----|-----|-----|-----|-----|-----|-----|-----|-----|
| SGK1   | RPS6KB1 | 74  | 79  | 71  | 48  | 81  | 80  | 97  | 87  | 100 |
| SBK1   | SBK1    | 92  | 75  | 82  | 68  | 75  | 95  | 100 | 100 | 94  |
| SGK    | SGK1    | 100 | 100 | 100 | 89  | 65  | 80  | 100 | 86  | 100 |
| SgK110 | SgK110  | 73  | 100 | 73  | 100 | 100 | 100 | 100 | 100 | 81  |
| SGK2   | SGK2    | 100 | 100 | 100 | 86  | 82  | 99  | 100 | 96  | 100 |
| SGK3   | SGK3    | 61  | 64  | 67  | 45  | 87  | 96  | 96  | 93  | 93  |
| SIK    | SIK1    | 98  | 93  | 88  | 48  | 100 | 50  | 74  | 80  | 96  |
| SIK2   | SIK2    | 100 | 94  | 100 | 41  | 92  | 66  | 100 | 91  | 81  |
| SLK    | SLK     | 94  | 100 | 76  | 7.7 | 93  | 31  | 89  | 92  | 98  |
| SNARK  | NUAK2   | 67  | 70  | 60  | 4.8 | 26  | 65  | 100 | 91  | 97  |
| SNRK   | SNRK    | 86  | 72  | 75  | 80  | 96  | 100 | 100 | 100 | 97  |
| SRC    | SRC     | 79  | 76  | 74  | 6.5 | 71  | 19  | 89  | 74  | 89  |
| SRMS   | SRMS    | 83  | 80  | 71  | 43  | 81  | 42  | 100 | 96  | 87  |
| SRPK1  | SRPK1   | 100 | 83  | 77  | 17  | 24  | 78  | 74  | 74  | 85  |
| SRPK2  | SRPK2   | 84  | 65  | 89  | 97  | 100 | 100 | 78  | 100 | 100 |
| SRPK3  | SRPK3   | 78  | 72  | 72  | 73  | 80  | 89  | 86  | 99  | 71  |
| STK16  | STK16   | 76  | 79  | 69  | 7   | 90  | 3.1 | 84  | 90  | 81  |
| STK33  | STK33   | 99  | 100 | 99  | 97  | 100 | 92  | 94  | 100 | 90  |
| STK35  | STK35   | 100 | 100 | 63  | 56  | 99  | 6.3 | 98  | 90  | 100 |
| STK36  | STK36   | 80  | 73  | 28  | 90  | 90  | 79  | 84  | 85  | 85  |
| STK39  | STK39   | 100 | 100 | 90  | 65  | 64  | 65  | 100 | 85  | 94  |
| SYK    | SYK     | 90  | 88  | 72  | 33  | 73  | 76  | 79  | 67  | 82  |
| TAK1   | MAP3K7  | 67  | 72  | 46  | 4   | 56  | 71  | 100 | 88  | 100 |
| TAOK1  | TAOK1   | 85  | 74  | 35  | 96  | 72  | 10  | 100 | 100 | 87  |
| TAOK2  | TAOK2   | 70  | 83  | 81  | 99  | 90  | 5.6 | 90  | 91  | 96  |
| TAOK3  | TAOK3   | 81  | 94  | 90  | 100 | 81  | 71  | 100 | 100 | 99  |
| TBK1   | TBK1    | 84  | 78  | 84  | 18  | 81  | 66  | 66  | 69  | 93  |
| TEC    | TEC     | 95  | 94  | 93  | 40  | 100 | 91  | 91  | 94  | 100 |
| TESK1  | TESK1   | 83  | 97  | 63  | 61  | 100 | 8.9 | 89  | 84  | 89  |
| TGFBR1 | TGFBR1  | 91  | 94  | 72  | 81  | 100 | 7.8 | 56  | 85  | 69  |
| TGFBR2 | TGFBR2  | 89  | 5.9 | 48  | 32  | 100 | 14  | 82  | 100 | 38  |
| TIE1   | TIE1    | 100 | 88  | 44  | 73  | 94  | 51  | 100 | 100 | 93  |
| TIE2   | TEK     | 92  | 36  | 51  | 68  | 94  | 40  | 80  | 98  | 100 |
| TLK1   | TLK1    | 98  | 96  | 83  | 85  | 91  | 76  | 79  | 80  | 75  |
| TLK2   | TLK2    | 83  | 86  | 82  | 75  | 98  | 87  | 79  | 86  | 95  |
| TNIK   | TNIK    | 92  | 86  | 84  | 18  | 64  | 46  | 77  | 76  | 84  |
| TNK1   | TNK1    | 100 | 100 | 89  | 47  | 97  | 37  | 95  | 90  | 90  |
| TNK2   | TNK2    | 84  | 81  | 76  | 51  | 99  | 83  | 100 | 100 | 90  |
| TNNI3K | TNNI3K  | 94  | 100 | 75  | 38  | 100 | 53  | 71  | 94  | 93  |
| TRKA   | NTRK1   | 97  | 73  | 45  | 7.5 | 38  | 3.9 | 81  | 74  | 100 |
| TRKB   | NTRK2   | 100 | 100 | 65  | 12  | 62  | 12  | 95  | 83  | 100 |
| TRKC   | NTRK3   | 100 | 100 | 87  | 29  | 38  | 12  | 100 | 100 | 100 |
| TRPM6  | TRPM6   | 98  | 83  | 57  | 54  | 77  | 89  | 96  | 91  | 100 |
| TSSK1B | TSSK1B  | 100 | 92  | 100 | 96  | 100 | 93  | 95  | 100 | 100 |
| TSSK3  | TSSK3   | 100 | 91  | 97  | 73  | 90  | 86  | 98  | 94  | 93  |
| TTK    | TTK     | 86  | 57  | 4.9 | 47  | 100 | 15  | 81  | 68  | 62  |

|                              |         |     |     |     |      |     |     |     |     |     |
|------------------------------|---------|-----|-----|-----|------|-----|-----|-----|-----|-----|
| TXK                          | TXK     | 75  | 83  | 80  | 31   | 93  | 36  | 100 | 100 | 97  |
| TYK2(JH1domain-catalytic)    | TYK2    | 100 | 100 | 100 | 8.1  | 11  | 93  | 70  | 68  | 98  |
| TYK2(JH2domain-pseudokinase) | TYK2    | 59  | 51  | 46  | 1.6  | 27  | 57  | 84  | 82  | 81  |
| TYRO3                        | TYRO3   | 51  | 92  | 41  | 51   | 84  | 51  | 100 | 100 | 95  |
| ULK1                         | ULK1    | 69  | 71  | 79  | 72   | 76  | 100 | 100 | 100 | 100 |
| ULK2                         | ULK2    | 99  | 100 | 92  | 72   | 75  | 77  | 96  | 91  | 100 |
| ULK3                         | ULK3    | 90  | 94  | 71  | 8.2  | 69  | 84  | 100 | 96  | 99  |
| VEGFR2                       | KDR     | 73  | 85  | 74  | 14   | 75  | 43  | 100 | 97  | 100 |
| VPS34                        | PIK3C3  | 47  | 65  | 75  | 71   | 69  | 95  | 100 | 74  | 75  |
| VRK2                         | VRK2    | 74  | 96  | 97  | 36   | 3.8 | 100 | 100 | 100 | 73  |
| WEE1                         | WEE1    | 90  | 97  | 99  | 100  | 100 | 62  | 72  | 81  | 88  |
| WEE2                         | WEE2    | 82  | 62  | 66  | 77   | 95  | 87  | 94  | 81  | 97  |
| WNK1                         | WNK1    | 84  | 76  | 4.9 | 79   | 82  | 1.6 | 100 | 92  | 85  |
| WNK2                         | WNK2    | 73  | 71  | 0   | 100  | 63  | 16  | 100 | 100 | 78  |
| WNK3                         | WNK3    | 90  | 83  | 1.6 | 83   | 91  | 16  | 100 | 92  | 98  |
| WNK4                         | WNK4    | 100 | 100 | 11  | 100  | 97  | 4.8 | 100 | 100 | 93  |
| YANK1                        | STK32A  | 71  | 63  | 55  | 28   | 82  | 99  | 100 | 99  | 95  |
| YANK2                        | STK32B  | 77  | 98  | 87  | 88   | 100 | 79  | 85  | 93  | 100 |
| YANK3                        | STK32C  | 82  | 93  | 70  | 70   | 100 | 81  | 89  | 100 | 81  |
| YES                          | YES1    | 75  | 82  | 58  | 27   | 98  | 43  | 100 | 100 | 99  |
| YSK1                         | STK25   | 79  | 97  | 81  | 70   | 96  | 41  | 100 | 99  | 100 |
| YSK4                         | MAP3K19 | 90  | 40  | 28  | 0.25 | 29  | 35  | 91  | 96  | 53  |
| ZAK                          | ZAK     | 78  | 87  | 90  | 44   | 100 | 69  | 100 | 99  | 95  |
| ZAP70                        | ZAP70   | 95  | 99  | 100 | 61   | 73  | 94  | 100 | 93  | 93  |

## General synthetic methods

<sup>1</sup>H NMR spectra were recorded on a BRUKER 400 MHz spectrometer. Chemical shifts are reported as  $\delta$  values downfield from internal TMS in appropriate organic solutions. The abbreviations used for explaining the multiplicities were as follows: s = singlet, d = doublet, t = triplet, q = quartet, m = multiplet, br = broad. High resolution mass (ESI HRMS) was recorded on a Thermofisher Q Exactive™ Hybrid Quadrupole-Orbitrap™ Mass Spectrometer. The relative purity and the mass of the products were confirmed by LC/MS (220 nm to 420 nm) on a Waters acquity uplc photodiode array detector system using the following conditions: Column, BEH C18 50\*2.1 mm; 1.8 $\mu$ m ; Solvent A, water 0.1% formic acid or water ammonium carbonate 2 g/l; Solvent B, CH<sub>3</sub>CN; flow rate, 0.8 ml/min; run time, 2.2 min; gradient, from 5 to 95% solvent B; mass detector, Waters SQ detector. All compounds were purified by LC/MS on a waters Autopurification system using the following conditions : Column, Xbridge C18 150\*30mm, 5 $\mu$ m; Solvent A, water 0.1% formic acid or water ammonium carbonate 2 g/l; Solvent B, CH<sub>3</sub>CN; flow rate, 50 ml/min; run time, 10 or 15 min; with adapted isocratic elution mode; mass detector, Waters ZQ detector.

### Abbreviations

|                                 |                                        |                   |                               |
|---------------------------------|----------------------------------------|-------------------|-------------------------------|
| AcOH                            | acetic acid                            | EtOAc             | ethyl acetate                 |
| NH <sub>3</sub>                 | ammonia                                | Et <sub>2</sub> O | diethyl ether                 |
| HCl                             | hydrochloric acid                      | THF               | tetrahydrofuran               |
| MeOH                            | methanol                               | DMSO              | dimethyl sulfoxide            |
| MeCN                            | acetonitrile                           | HCl               | hydrochloric acid             |
| Na <sub>2</sub> SO <sub>4</sub> | sodium sulfate                         | DMF               | <i>N,N</i> -dimethylformamide |
| HPLC                            | high performance liquid chromatography |                   |                               |

### Preparation of compounds shown in Table 1. R<sub>1</sub> exploration

#### Preparation of 5-(4-Amino-1-isopropyl-1H-pyrazolo[3,4-d]pyrimidin-3-yl)benzo[d]oxazol-2-amine (1)

Compound **1** was prepared by employing the following sequence:

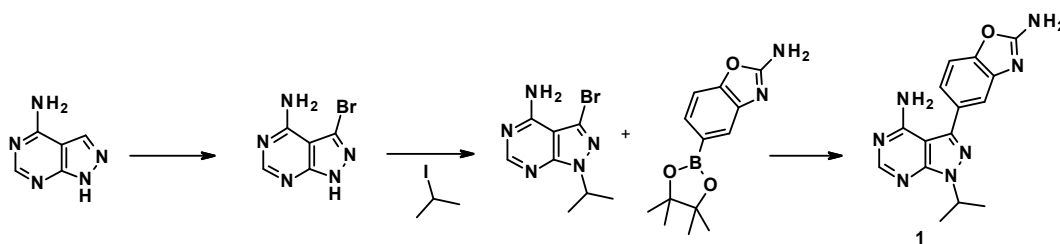

#### 3-Bromo-1-isopropyl-1H-pyrazolo[3,4-d]pyrimidin-4-amine

*N*-Bromosuccinimide (6.92 g, 38.9 mmol, 1.05 eq.) was added to a suspension of 1*H*-pyrazolo[3,4-*d*]pyrimidin-4-ylamine (5.00 g, 37.0 mmol, 1.00 eq.) in DMF (50 ml) and the reaction mixture was heated at 60 °C for 3 hours, cooled to room temperature and the solid was collected by filtration, washed with diethyl ether and dried to a constant weight to afford the title compound (7.92 g, quant.) as a beige solid: LCMS ( $t_R=0.70$  min., purity= 96.7%), ESI+  $m/z$  214, 216(M+H)<sup>+</sup>. The compound was directly engaged in the next step without further purification.

2-Iodopropane (5.54 ml, 55.5 mmol, 1.50 eq.) was added to a stirred solution of 3-bromo-1*H*-pyrazolo[3,4-*d*]pyrimidin-4-ylamine (7.92 g, 37.0 mmol, 1.00 eq.) and cesium carbonate (36.17 g, 110 mmol, 3.00 eq.) in DMF (30.0 ml). The reaction mixture was stirred at room temperature for 16 h, filtered and the filtrate was purified by flash chromatography (silica gel, DCM-MeOH (0-20%). The fractions were evaporated and the residue crystallised from heptane / EtOAc. The solid was collected by filtration and dried to a constant weight to afford the title compound (5.75 g, 61%) as a beige solid: LCMS ( $t_R=0.79$  min., purity= 99.8%), ESI+  $m/z$  256, 257 (M+H)<sup>+</sup>; <sup>1</sup>H NMR (400 MHz, DMSO-*d*<sub>6</sub>)  $\delta$  1.42-1.44 (d,  $J = 6.7$  Hz, 6H), 4.94-5.01 (q,  $J = 6.7$  Hz, 1H), 8.20 (s, 1H).

#### **5-(4-Amino-1-isopropyl-1*H*-pyrazolo[3,4-*d*]pyrimidin-3-yl)benzo[*d*]oxazol-2-amine (1)**

Tetrakis(triphenylphosphine)palladium(0) (2.08 g, 1.80 mmol, 0.08 eq.) was added to a mixture of 3-bromo-1-isopropyl-1*H*-pyrazolo[3,4-*d*]pyrimidin-4-ylamine (5.75 g, 22.5 mmol, 1.00 eq.), 5-(4,4,5,5-tetramethyl-1,3,2-dioxaborolan-2-yl)benzo[*d*]oxazol-2-amine (7.59 g, 29.2 mmol, 1.30 eq.) and sodium carbonate (11.9 g, 110 mmol, 5.00 eq.) in 1,4-dioxane (86.3 mL) et water (28.8 mL): The reaction mixture was heated at 110 °C for 2 h 45 min, cooled to room temperature and filtered through a pad of Celite. The filtrate was concentrated and the residue was triturated with DCM. The solid was recuperated by filtration, washed with EtOAc and dried to a constant weight to afford the title compound (**1**, 6.42g, 92%) as a pale pink solid that was used without further purification: <sup>1</sup>H NMR (400 MHz, DMSO-*d*<sub>6</sub>)  $\delta$  1.49 (d,  $J = 6.7$  Hz, 6H), 5.05 (p,  $J = 6.7$  Hz, 1H), 7.24 (dd,  $J = 8.2, 1.8$  Hz, 1H), 7.41 (d,  $J = 1.7$  Hz, 1H), 7.46 (d,  $J = 8.1$  Hz, 1H), 7.52 (s, 2H), 8.23 (s, 1H).

HRMS (ESI) calculated for C<sub>15</sub>H<sub>15</sub>N<sub>7</sub>O [M+H]<sup>+</sup> 310.1411, found 310.14096.

#### **Preparation of :**

- **5-(6-Amino-4-chloro-1-isopropyl-1*H*-pyrazolo[3,4-*d*]pyrimidin-3-yl)benzo[*d*]oxazol-2-amine (3e)**
- **5-(6-Amino-1-isopropyl-4-methyl-1*H*-pyrazolo[3,4-*d*]pyrimidin-3-yl)benzo[*d*]oxazol-2-amine (3a)**
- **5-(6-Amino-1-butyl-4-chloro-1*H*-pyrazolo[3,4-*d*]pyrimidin-3-yl)benzo[*d*]oxazol-2-amine (4b)**
- **5-(6-Amino-1-butyl-4-methyl-1*H*-pyrazolo[3,4-*d*]pyrimidin-3-yl)benzo[*d*]oxazol-2-amine (4a)**
- **5-(6-Amino-4-ethyl-1-isopropyl-1*H*-pyrazolo[3,4-*d*]pyrimidin-3-yl)benzo[*d*]oxazol-2-amine (3b)**

Compound **3e**, **3a**, **4a** and **3b** were prepared by employing the following sequence:

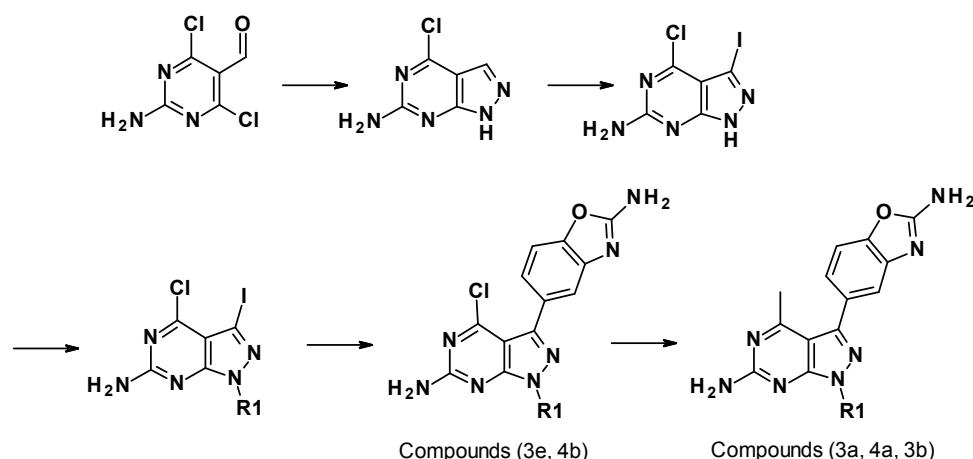

#### 4-Chloro-1*H*-pyrazolo[3,4-*d*]pyrimidin-6-amine

2-Amino-4,6-dichloropyrimidine-5-carbaldehyde (30.0 g, 156 mmol, 1.0 equiv) and triethylamine (30.5 mL, 219 mmol, 1.15 equiv) were dissolved into a mixture of THF/H<sub>2</sub>O 3.5/1. Hydrazine solution 98 wt % in water (9.10 mL, 188 mmol, 1.0 equiv) was added dropwise over a period of 20 min. The mixture was stirred at 60 °C for 1 h 30 min and left at room temperature overnight affording a heterogeneous mixture. After filtration of the orange precipitate, the filtrate was concentrated in under vacuum to give the desired product (15.2 g, 89.6 mmol, 57%) that was used without further purification: LCMS (*t<sub>R</sub>*=0.78 min., purity= 100%), ESI+ *m/z* 170 (M+H)<sup>+</sup>; <sup>1</sup>H NMR (400 MHz, DMSO-*d*<sub>6</sub>) δ 7.15 (br s, 2H), 7.96 (s, 1H), 13.25 (s, 1H).

#### 4-Chloro-3-iodo-1*H*-pyrazolo[3,4-*d*]pyrimidin-6-amine

To a solution of 4-chloro-1*H*-pyrazolo[3,4-*d*]pyrimidin-6-amine (7.0 g, 41.28 mmol, 1.0 equiv) in DMF (105 mL, 0.4 M) was added *N*-iodosuccinimide (18.57g, 82.56 mmol, 2.0 equiv) at room temperature. The mixture was heated at 80°C until full conversion by HPLC-MS of the starting material and cooled down to 25°C to be transferred over a 1L solution of cold water. The precipitate formed was filtered and dried to obtain the desired product as a yellow solid (12.0 g, 98%): LCMS (*t<sub>R</sub>*=1.08 min., purity= 99%), ESI+ *m/z* 296 (M+H)<sup>+</sup>; <sup>1</sup>H NMR (400 MHz, DMSO-*d*<sub>6</sub>) δ 7.31-7.48 (br s, 2H), 13.51 (s, 1H).

#### Generic alkylation procedure to afford 4-amino-3-iodo-1-alkyl-1*H*-pyrazolo[3,4-*d*]pyrimidin-6-amine analogues

To a solution of 4-chloro-3-iodo-1*H*-pyrazolo[3,4-*d*]pyrimidin-6-amine in DMF (0.34 M) was added cesium carbonate (1.05 equiv) and the desired alkylation reagent (R<sub>1</sub>-X, 1.05 equiv.). The mixture was stirred at room temperature until completion of the reaction by HPLC-MS and then diluted with EtOAc and water. The separated aqueous phase was extracted with EtOAc and the combined organic layers were washed with water, brine and dried over Na<sub>2</sub>SO<sub>4</sub>. After filtration, the solvent was removed under reduced pressure and the residue was purified by silica gel column chromatography to yield desired alkylated derivative.



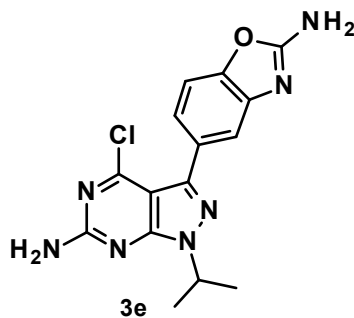

### 5-(6-Amino-4-chloro-1-isopropyl-1H-pyrazolo[3,4-d]pyrimidin-3-yl)benzo[d]oxazol-2-amine (3e)

To a stirred suspension of 3-iodo-4-chloro-1H-pyrazolo[3,4-d]pyrimidin-6-ylamine (1.00 g, 3.64 mmol, 1.00 eq.) and cesium carbonate (2.37 g; 7.27 mmol; 2.00 eq.) in DMF (10 ml), was added 2-iodopropane (0.38 ml; 3.82 mmol, 1.05 eq.) and the reaction mixture was stirred for 3 h and 30 minutes at room temperature. Water was added and the reaction mixture was extracted into EtOAc. The organic phases were washed with water, dried over MgSO<sub>4</sub> and concentrated to dryness. The residue was purified by flash chromatography (silica gel, heptane/ EtOAc 1:1) to afford the title compound (880 mg, 76%): LCMS (*t<sub>R</sub>*=0.97 min., purity= 95%), ESI+ *m/z* 318 (M+H)<sup>+</sup>; <sup>1</sup>H NMR (400 MHz, DMSO-*d*<sub>6</sub>) δ 1.38 (d, *J* = 6.6 Hz, 6H), 2.63 (s, 3H), 4.80 (hept, *J* = 6.6 Hz, 1H), 6.91 (s, 2H).

In a microwave tube, was added 4-chloro-3-iodo-1-isopropyl-1H-pyrazolo[3,4-d]pyrimidin-6-ylamine (0.50 g, 1.48 mmol, 1.00 eq.) and 5-(4,4,5,5-tetramethyl-1,3,2-dioxaborolan-2-yl)benzo[d]oxazol-2-amine (0.58 g, 2.22 mmol, 1.50 eq.) to a mixture of 1,4-dioxane (5.28 ml) and a 2.0 M aqueous solution of potassium carbonate (2.22 ml, 4.44 mmol, 3.00 eq.). The reaction mixture was degassed and purged with argon. 1,1'-Bis(diphenylphosphino)ferrocenepalladium(II) dichloride, dichloromethane (121 mg, 0.15 mmol, 0.10 eq.) was added rapidly and the reaction mixture was heated at 100 °C for 60 minutes, cooled to room temperature and EtOAc was added. The reaction mixture was filtered, concentrated to dryness and purified by mass-triggered preparative LCMS (acidic conditions) to afford the title compound (3e, 210 mg, 41%): LCMS (*t<sub>R</sub>*=1.03 min., purity= 97%), ESI+ *m/z* 344 (M+H)<sup>+</sup>; <sup>1</sup>H NMR (DMSO-*d*<sub>6</sub>) δ 1.47 (d, *J* = 6.7 Hz, 6H), 4.91 (h, *J* = 6.7 Hz, 1H), 7.22 – 7.32 (m, 3H), 7.41 (d, *J* = 8.2 Hz, 1H), 7.44 – 7.50 (m, 3H).

HRMS (ESI) calculated for C<sub>16</sub>H<sub>14</sub>ClN<sub>7</sub>O [M+H]<sup>+</sup> 344.1021, found 344.1019.

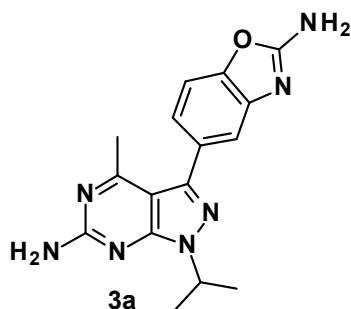

### 5-(6-Amino-1-isopropyl-4-methyl-1H-pyrazolo[3,4-d]pyrimidin-3-yl)benzo[d]oxazol-2-amine (3a)

5-(6-Amino-4-chloro-1-isopropyl-1H-pyrazolo[3,4-d]pyrimidin-3-yl)benzo[d]oxazol-2-amine (3e, 50.0 mg, 0.15 mmol, 1.00 eq.) was dissolved in THF (250 μl) and bis(tri-*t*-butylphosphine)palladium(0) (14.9 mg, 0.03 mmol, 0.20 eq.) was added at 0 °C. The reaction mixture was degassed and purged with argon and 1M solution of dimethylzinc in heptane (436 μl, 0.44 mmol, 3.00 eq.) was added

keeping the temperature at 0 °C. The reaction mixture was stirred at room temperature overnight, quenched with a saturated aqueous solution of ammonium chloride and extracted with EtOAc. The organic phase was washed with brine, dried over MgSO<sub>4</sub> and concentrated to dryness. The residue was purified by mass-triggered preparative HPLC (acidic method) to afford the title compound (**3a**, 14.3 mg, 30%) as a beige solid: LCMS (*t<sub>R</sub>*=0.92 min., purity= 97%), ESI+ *m/z* 324 (M+H)<sup>+</sup>; <sup>1</sup>H NMR (400 MHz, DMSO-*d*<sub>6</sub>) δ 1.42-1.46 (d, *J* = 7.1 Hz, 6H), 2.35 (s, 3H), 4.87-4.94 (hp, *J* = 7.1 Hz, 1H), 6.72-6.76 (br s, 2H), 7.22-7.26 (d, *J* = 8.1 Hz, 1H), 7.38-7.42 (overlapping s and d, 2H), 7.46-7.52 (br s, 2H).

HRMS (ESI) calculated for C<sub>16</sub>H<sub>17</sub>N<sub>7</sub>O [M+H]<sup>+</sup> 324.1567, found 324.1567.

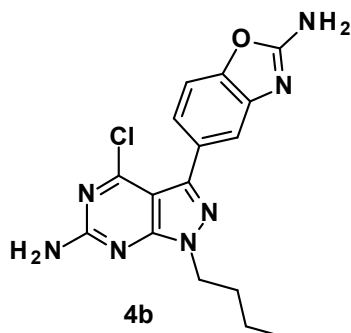

#### 5-(6-Amino-1-butyl-4-chloro-1H-pyrazolo[3,4-d]pyrimidin-3-yl)benzo[d]oxazol-2-amine (**4b**)

4-Chloro-3-iodo-1H-pyrazolo[3,4-d]pyrimidin-6-amine (4.00 g, 4.06 mmol, 1.00 eq.) was dissolved in DMF (14.4 ml) and cesium carbonate (1.32 g, 4.06 mmol, 1.00 eq.) was added followed by 1-iodobutane (0.55 ml, 4.87 mmol, 1.20 eq.) at room temperature for 18 h. Water was added and the reaction mixture was extracted into EtOAc. The suspension was filtered and the organic phase was separated, washed with water and dried over MgSO<sub>4</sub> and concentrated to dryness. The residue was purified by flash chromatography (silica gel, heptane:EtOAc 8:2) to afford the alkylated intermediate (593 mg, 42%) as a yellow solid: LCMS (*t<sub>R</sub>*=1.22 min., purity= 99%), ESI+ *m/z* 352 (M+H)<sup>+</sup>.

In a microwave tube, was added 1-butyl-4-chloro-3-iodo-1H-pyrazolo[3,4-d]pyrimidin-6-amine (543 mg, 1.54 mmol, 1.00 eq.), 5-(4,4,5,5-tetramethyl-1,3,2-dioxaborolan-2-yl)benzo[d]oxazol-2-amine (603 mg, 2.32 mmol, 1.50 eq.) to a mixture of 1,4-dioxane (5.28 ml) and a 2.0 M aqueous solution of potassium carbonate (2.32 ml, 4.63 mmol, 3.00 eq.). The reaction mixture was degassed and purged with argon. 1,1'-Bis(diphenylphosphino)ferrocene-palladium(II) dichloride, dichloromethane (126 mg, 0.15 mmol, 0.10 eq.) was added rapidly and the reaction mixture was heated at 100 °C for 60 minutes, cooled to room temperature, concentrated and purified directly by mass-triggered preparative LCMS (acidic conditions) to afford the title compound (**4b**, 171 mg, 31%): LCMS (*t<sub>R</sub>*=1.08 min., purity= 99%), ESI+ *m/z* 358 (M+H)<sup>+</sup>; <sup>1</sup>H NMR (DMSO-*d*<sub>6</sub>) δ 0.82 (t, *J* = 7.3 Hz, 2H), 1.83 (h, *J* = 7.3 Hz, 2H), 4.21 (t, *J* = 7.3 Hz, 1H), 7.20 – 7.27 (overlapping signals br s and d, 3H), 7.35 (d, *J* = 8.2 Hz, 1H), 7.46 - 7.49 (overlapping signals br s and s, 3H).

HRMS (ESI) calculated for C<sub>16</sub>H<sub>14</sub>ClN<sub>7</sub>O [M+H]<sup>+</sup> 344.1021, found 344.1019.

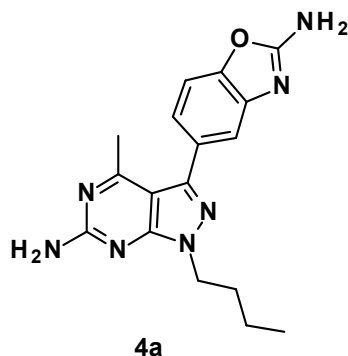

#### 5-(6-Amino-1-butyl-4-methyl-1H-pyrazolo[3,4-*d*]pyrimidin-3-yl)benzo[*d*]oxazol-2-amine (**4a**)

5-(6-amino-1-butyl-4-chloro-1H-pyrazolo[3,4-*d*]pyrimidin-3-yl)benzo[*d*]oxazol-2-amine (80.0 mg, 0.22 mmol, 1.00 eq.) was dissolved in THF (500  $\mu$ l) and bis(tri-*t*-butylphosphine)palladium(0) (13.0 mg, 0.01 mmol, 0.05 eq.) was added at 0  $^{\circ}$ C. The reaction mixture was degassed and purged with argon and a solution of dimethylzinc in THF (0.37 ml, 0.45 mmol, 2.00 eq.) was added keeping the temperature at 0  $^{\circ}$ C. The reaction mixture was stirred at room temperature overnight, quenched with a saturated aqueous solution of ammonium chloride and extracted with EtOAc. The organic phase was washed with brine, dried over MgSO<sub>4</sub> and concentrated to dryness. The residue was purified by mass-triggered preparative HPLC (acidic method) to afford the title compound (**4a**, 51.1 mg, 70%) as an orange solid. LCMS ( $t_R$ =3.19 min., purity= 97%, [C1-ACN-Full Range 7.5 min, positive ionization, UV 254 nm]), ESI+  $m/z$  338 (M+H)<sup>+</sup>; R<sub>f</sub> = 0.15 (Hex/EtOAc:1/1) [SiO<sub>2</sub> ; UV, KMnO<sub>4</sub>]; <sup>1</sup>H NMR (400 MHz, DMSO-*d*<sub>6</sub>)  $\delta$  0.90 (t, J = 7.4 Hz, 3H), 1.36 – 1.19 (m, 2H), 1.71 – 1.85 (m, 2H), 2.35 (s, 3H), 4.18 (t, J = 7.0 Hz, 2H), 6.78 (s, 2H), 7.16 – 7.27 (m, 1H), 7.34 – 7.44 (m, 2H), 7.49 (s, 2H).

HRMS (ESI) calculated for C<sub>16</sub>H<sub>19</sub>N<sub>7</sub>O [M+H]<sup>+</sup> 337.1651, found 337.1650.

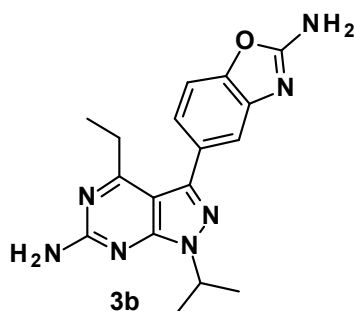

#### 5-(6-Amino-4-ethyl-1-isopropyl-1H-pyrazolo[3,4-*d*]pyrimidin-3-yl)benzo[*d*]oxazol-2-amine (**3b**)

5-(6-amino-4-chloro-1-isopropyl-1H-pyrazolo[3,4-*d*]pyrimidin-3-yl)benzo[*d*]oxazol-2-amine **3e** (75.0 mg, 0.22 mmol, 1.00 eq.) was dissolved in THF (2.00 ml). The reaction mixture was degassed and purged with argon then cooled to 0  $^{\circ}$ C. Bis(tri-*t*-butylphosphine)palladium(0) (22.3 mg, 0.04 mmol, 0.20 eq.) was added followed by diethylzinc (0.87 ml, 1.00 M, 0.87 mmol; 4.00 eq.). The reaction mixture was stirred at room temperature for 1 h, quenched with a saturated aqueous solution of NH<sub>4</sub>Cl, extracted into EtOAc. The organic phase was washed with brine, dried over MgSO<sub>4</sub> and concentrated to dryness. The residue was purified by mass-triggered preparative HPLC to afford the title compound (**3b**, 15.1 mg, 21%) as a pale yellow solid: LCMS ( $t_R$ =0.93 min., purity= 99%), ESI+  $m/z$  338 (M+H)<sup>+</sup>; <sup>1</sup>H NMR (400 MHz, DMSO-*d*<sub>6</sub>)  $\delta$  1.02 (t, J = 7.5 Hz, 3H), 1.45 (d, J = 6.7 Hz, 6H), 2.63 – 2.71 (m, 2H), 4.90 (h, J = 6.7 Hz, 1H), 6.74 (s, 2H), 7.17 (dd, J = 8.2, 1.7 Hz, 1H), 7.36 (d, J = 1.6 Hz, 1H), 7.41 (d, J = 8.2 Hz, 1H), 7.49 (s, 2H).

HRMS (ESI) calculated for C<sub>17</sub>H<sub>19</sub>N<sub>7</sub>O [M+H]<sup>+</sup> 338.1724, found 338.1721.

### Preparation of (6-Amino-3-(2-aminobenzo[d]oxazol-5-yl)-1-isopropyl-1H-pyrazolo[3,4-d]pyrimidin-4-yl)methanol (3c)

The title compound **3c** was prepared using the following sequence:

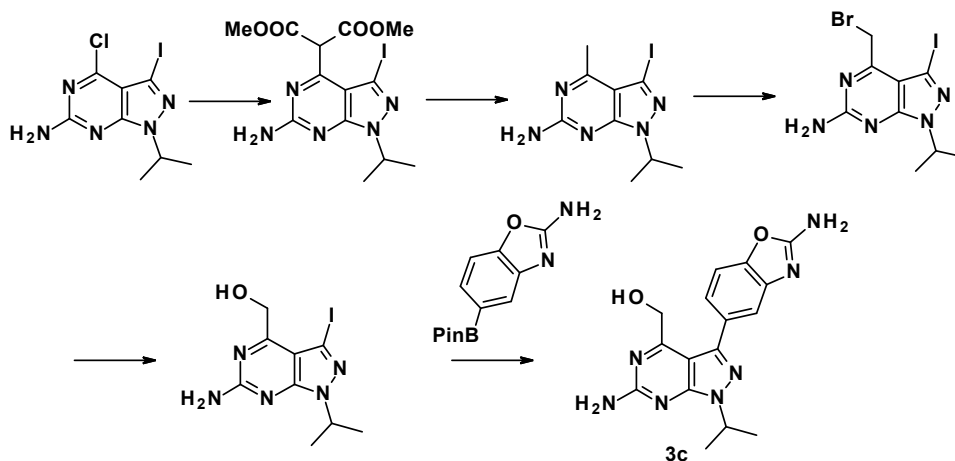

#### Dimethyl 2-(6-amino-3-iodo-1-isopropyl-1H-pyrazolo[3,4-d]pyrimidin-4-yl)malonate

To a stirred suspension of 4-chloro-3-iodo-1-isopropyl-1H-pyrazolo[3,4-d]pyrimidin-6-ylamine (2.00 g, 5.93 mmol, 1.00 eq.) and cesium carbonate (4.63 g, 14.2 mmol, 2.40 eq.) in DMSO (13.2 ml) at room temperature, was added dimethyl malonate (1.88 g, 14.2 mmol, 2.40 eq.). The resulting suspension was heated at 100 °C for 2 h 15 min to afford a yellow suspension. The reaction mixture was cooled to room temperature and water was added. The reaction mixture was extracted into EtOAc and the organic phase was recuperated, washed with water, dried over MgSO<sub>4</sub> and concentrated to dryness to afford the title compound (2.60 g, 95%) as a yellow solid that was used without further purification: LCMS (*t*<sub>R</sub>=1.08 min., purity= 94%), ESI+ *m/z* 434 (M+H)<sup>+</sup>; <sup>1</sup>H NMR (400 MHz, DMSO-*d*<sub>6</sub>) δ 1.43 (d, *J* = 6.6 Hz, 6H), 3.78 (s, 6H), 4.78-4.86 (hept, *J* = 6.6 Hz, 1H), 5.62 (s, 1H), 7.13 (br s, 2H).

#### 3-Iodo-1-isopropyl-4-methyl-1H-pyrazolo[3,4-d]pyrimidin-6-amine

Dimethyl 2-(6-amino-3-iodo-1-isopropyl-1H-pyrazolo[3,4-d]pyrimidin-4-yl)malonate (2.40 g; 5.54 mmol; 1.00 eq.) was suspended in 6N HCl (aq) (52 ml) and heated at 50 °C for 4 hours to afford a yellow solution. The reaction mixture was cooled to 0 °C and 8N NaOH was added to neutral pH and the reaction mixture was extracted into EtOAc. The organic phases was dried over MgSO<sub>4</sub> and concentrated to dryness to afford the title compound (1.60 g, 91%) as an orange solid: LCMS (*t*<sub>R</sub>=0.97 min., purity= 95%), ESI+ *m/z* 318 (M+H)<sup>+</sup>; <sup>1</sup>H NMR (400 MHz, DMSO-*d*<sub>6</sub>) δ 1.42 (d, *J* = 6.7 Hz, 6H), 2.64 (s, 3H), 4.74-4.84 (hept, *J* = 6.7 Hz, 1H), 6.91 (s, 2H).

#### (6-Amino-3-iodo-1-isopropyl-1H-pyrazolo[3,4-d]pyrimidin-4-yl)methanol

To a stirred solution of 3-iodo-1-isopropyl-4-methyl-1H-pyrazolo[3,4-d]pyrimidin-6-amine (730 mg, 2.30 mmol, 1.00 eq.) in DCM (7.30 ml), were added *N*-bromosuccinimide (409 mg, 2.30 mmol, 1.00 eq.) and benzoyl peroxide (27.9 mg, 0.12 mmol, 0.05 eq) and the reaction mixture was heated at 70

°C for 10 h. **The** reaction mixture was evaporated to dryness, dissolved in DMF and purified directly by mass-triggered preparative LCMS to afford the title compound (480 mg, 53%) as an orange solid : LCMS ( $t_R=1.19$  min., purity= 97%), ESI+  $m/z$  396 (M+H)<sup>+</sup>. 4-(Bromomethyl)-3-iodo-1-isopropyl-1H-pyrazolo[3,4-d]pyrimidin-6-amine was directly engaged in the next step without further purification.

3-Iodo-1-isopropyl-4-methyl-1H-pyrazolo[3,4-d]pyrimidin-6-amine (480 mg, 1.21 mmol, 1.00 eq.) was dissolved in DMSO (4.8 ml) and NaHCO<sub>3</sub> (305 mg, 3.64 mmol, 3.00 eq.) was added and the reaction mixture was stirred at 50 °C for 16 h. The reaction mixture was purified directly by mass-triggered preparative LCMS to afford the title compound (60.0 mg, 15%) as a beige solid: LCMS ( $t_R=0.96$  min., purity= 97%), ESI+  $m/z$  334 (M+H)<sup>+</sup>; <sup>1</sup>H NMR (DMSO-*d*<sub>6</sub>)  $\delta$  1.40 (d,  $J$  = 6.7 Hz, 6H), 4.83 (dd,  $J$  = 6.1, 4.2 Hz, 3H), 5.14 (t,  $J$  = 5.6 Hz, 1H), 7.03 (s, 2H).

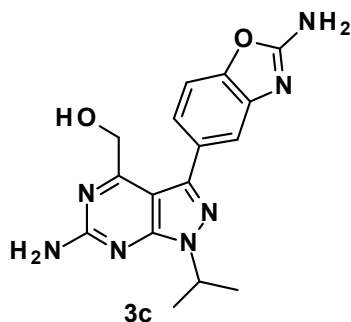

### (6-Amino-3-(2-aminobenzo[d]oxazol-5-yl)-1-isopropyl-1H-pyrazolo[3,4-d]pyrimidin-4-yl)methanol (3c)

In a microwave tube was added (6-amino-3-iodo-1-isopropyl-1H-pyrazolo[3,4-d]pyrimidin-4-yl)methanol (60.0 mg, 0.18 mmol, 1.00 eq.), 5-(4,4,5,5-tetramethyl-1,3,2-dioxaborolan-2-yl)benzo[d]oxazol-2-amine (70.3 mg, 0.27 mmol, 1.50 eq.), a 2.0 M aqueous solution of potassium carbonate (0.27 ml, 0.54 mmol, 3.00 eq.) and 1,4-dioxane (0.48 ml). The reaction mixture was degassed and purged with argon before 1,1'-bis(diphenylphosphino)ferrocenepalladium(II) dichloride.dichloromethane (14.7 mg, 0.02 mmol, 0.10 eq.) was added. The reaction mixture was heated at 100 °C for 30 min. The reaction mixture was cooled to room temperature and purified directly by mass-triggered preparative LCMS (acidic conditions) to afford the title compound (**3c**, 11.1 mg, 18.2%): LCMS ( $t_R=0.87$  min., purity= 99%), ESI+  $m/z$  340 (M+H)<sup>+</sup>; <sup>1</sup>H NMR (DMSO-*d*<sub>6</sub>)  $\delta$  1.47 (d,  $J$  = 6.7 Hz, 6H), 4.49 (d,  $J$  = 5.5 Hz, 2H), 4.93 (h,  $J$  = 6.6 Hz, 1H), 5.01 (t,  $J$  = 5.5 Hz, 1H), 6.88 (s, 2H), 7.27 (dd,  $J$  = 8.2, 1.7 Hz, 1H), 7.40 (d,  $J$  = 8.1 Hz, 1H), 7.42 – 7.54 (m, 3H).

HRMS (ESI) calculated for C<sub>16</sub>H<sub>17</sub>N<sub>7</sub>O<sub>2</sub> [M+H]<sup>+</sup> 340.1516, found 340.1511

### Preparation of: 5-(6-Amino-1-isopropyl-4-methoxy-1H-pyrazolo[3,4-d]pyrimidin-3-yl)benzo[d]oxazol-2-amine (3d)

The title compound **3d** was prepared using the following sequence:

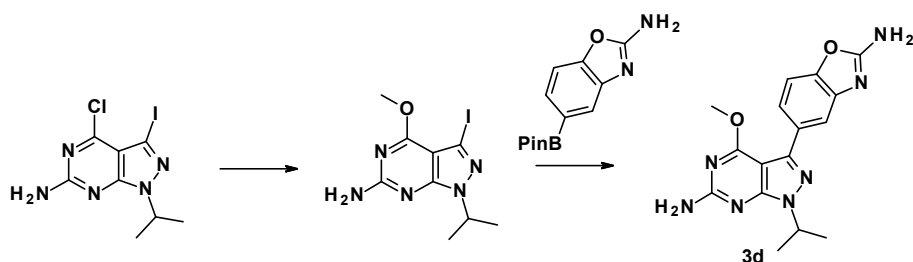

### 3-Iodo-1-isopropyl-4-methoxy-1H-pyrazolo[3,4-d]pyrimidin-6-amine

To a stirred solution of 4-chloro-3-iodo-1-isopropyl-1H-pyrazolo[3,4-d]pyrimidin-6-amine (300 mg, 0.89 mmol, 1.00 eq.) in MeOH (2.0 ml) was added 30% solution of sodium methoxide in MeOH (0.49 ml, 2.67 mmol, 3.00 eq.). The reaction mixture was stirred at room temperature for 30 minutes, quenched with a saturated solution of ammonium chloride and extracted into EtOAc. The organic phases were washed with brine, dried over MgSO<sub>4</sub> and concentrated to dryness to afford the title compound (280 mg, 95%) as an orange solid: LCMS (*t<sub>R</sub>*=1.18 min., purity= 99%), ESI+ *m/z* 334 (M+H)<sup>+</sup>; <sup>1</sup>H NMR (DMSO-*d*<sub>6</sub>) δ 1.37 (d, *J* = 6.6 Hz, 6H), 3.97 (s, 3H), 4.76 (h, *J* = 6.6 Hz, 1H), 6.88 (s, 2H)

### 5-(6-Amino-1-isopropyl-4-methoxy-1H-pyrazolo[3,4-d]pyrimidin-3-yl)benzo[d]oxazol-2-amine (3d)

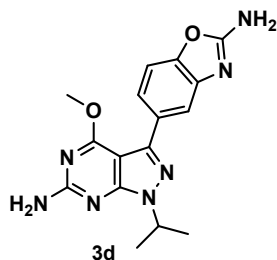

In a microwave tube, 3-Iodo-1-isopropyl-4-methoxy-1H-pyrazolo[3,4-d]pyrimidin-6-amine (98.0 mg, 0.29 mmol, 1.00 eq.) and a 2.0M aqueous solution of potassium carbonate (0.44 ml, 0.88 mmol, 3.00 eq.) in 1,4-dioxane (1.03 ml) were degassed and purged with argon. 1,1'-Bis(diphenylphosphino)ferrocenepalladium(II) dichloride.dichloromethane (24.0 mg, 0.03 mmol, 0.10 eq.) was added followed by 5-(4,4,5,5-tetramethyl-1,3,2-dioxaborolan-2-yl)benzo[d]oxazol-2-amine (115 mg, 0.44 mmol, 1.50 eq.) and the reaction mixture was heated at 100 °C for 30 min. The reaction mixture was cooled to room temperature. EtOAc was added and the reaction mixture filtered and the filtrate was concentrated and purified by mass-triggered preparative LCMS (basic conditions) to afford the title compound (**3d**, 34 mg, 34%) as a pale yellow solid: LCMS (*t<sub>R</sub>*=0.90 min., purity= 97%), ESI+ *m/z* 340 (M+H)<sup>+</sup>; <sup>1</sup>H NMR (DMSO-*d*<sub>6</sub>) δ 1.46 (d, *J* = 6.6 Hz, 6H), 3.99 (s, 3H), 4.88 (h, *J* = 6.7 Hz, 1H), 6.76 (s, 2H), 7.37 (d, *J* = 8.3 Hz, 1H), 7.42 (s, 2H), 7.59 (dd, *J* = 8.3, 1.7 Hz, 1H), 7.75 (d, *J* = 1.6 Hz, 1H).

HRMS (ESI) calculated for C<sub>16</sub>H<sub>17</sub>N<sub>7</sub>O<sub>4</sub> [M+H]<sup>+</sup> 340.1516, found 340.1515

### Preparation of 5-(6-Amino-4-fluoro-1-isopropyl-1H-pyrazolo[3,4-d]pyrimidin-3-yl)benzo[d]oxazol-2-amine (3f)

The title compound **3f** was prepared using the following sequence:

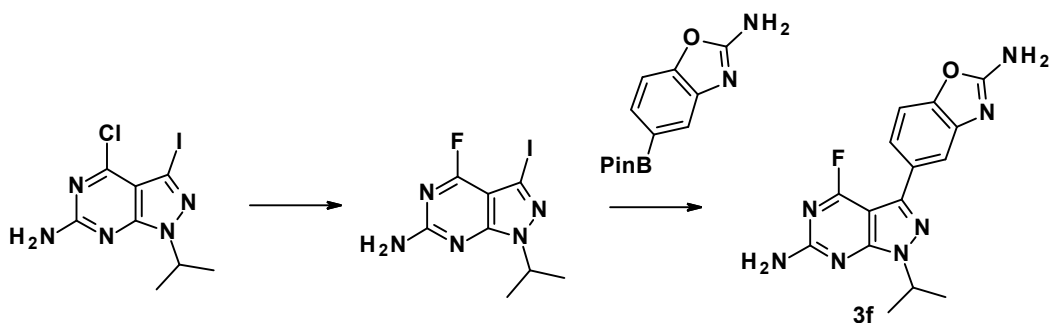

### 5-(6-Amino-4-fluoro-1-isopropyl-1H-pyrazolo[3,4-d]pyrimidin-3-yl)benzo[d]oxazol-2-amine (3f)

To a stirred solution of 4-chloro-3-iodo-1-isopropyl-1*H*-pyrazolo[3,4-*d*]pyrimidin-6-amine (300 mg, 0.89 mmol, 1.00 eq.) in THF (3.00 ml) was added triethylamine (0.15 ml, 1.07 mmol, 1.20 eq.) followed by a 1.0 M solution of tetrabutylammonium fluoride (0.89 ml, 0.89 mmol, 1.00 eq.). The reaction mixture was heated at 80 °C for 11 h, cooled to room temperature and diluted with EtOAc. The reaction mixture was washed with brine and the organic phase separated, dried over MgSO<sub>4</sub> and concentrated to dryness. The residue was purified by mass-triggered preparative LCMS to afford the title compound (150 mg, 53%) as a yellow solid: LCMS (*t*<sub>R</sub>=1.09 min., purity= 99%), ESI+ *m/z* 322 (M+H)<sup>+</sup>; <sup>1</sup>H NMR (DMSO-*d*<sub>6</sub>) δ 1.42 (d, *J* = 6.7 Hz, 6H), 4.81 (h, *J* = 6.7 Hz, 1H), 7.38 (br s, 2H).

In a microwave tube, 4-fluoro-3-iodo-1-isopropyl-1*H*-pyrazolo[3,4-*d*]pyrimidin-6-amine (20.0 mg, 0.06 mmol, 1.00 eq.) was added to a mixture of a 2.0 M aqueous solution of potassium carbonate (0.09 ml, 0.19 mmol, 3.00 eq.) and 5-(4,4,5,5-tetramethyl-1,3,2-dioxaborolan-2-yl)benzo[*d*]oxazol-2-amine (24.3 mg, 0.09 mmol, 1.50 eq.) in 1,4-dioxane (0.24 ml). The reaction mixture was degassed and purged with argon. 1,1'-Bis(diphenylphosphino)ferrocene-palladium(II) dichloride, dichloromethane (5.1 mg, 0.01 mmol, 0.10 eq.) was added and the reaction mixture was heated at 100 °C for 30 minutes, cooled to room temperature and MeOH was added. The reaction mixture was filtered, concentrated and purified directly by mass-triggered preparative LCMS (basic conditions) to afford the title compound **3f** (6 mg, 31%). δ 1.49 (d, *J* = 6.6 Hz, 6H), 4.92 (h, *J* = 6.9 Hz, 1H), 7.25 (s, 2H), 7.43 (d, *J* = 8.4 Hz, 1H), 7.51 (d, *J* = 4.7 Hz, 3H), 7.65 (s, 1H).

HRMS (ESI) calculated for C<sub>16</sub>H<sub>26</sub>N<sub>3</sub>O<sub>4</sub> [M+H]<sup>+</sup> 328.1317, found 328.1310.

#### Preparation of 5-(6-Amino-4-bromo-1-isopropyl-1*H*-pyrazolo[3,4-*d*]pyrimidin-3-yl)benzo[*d*]oxazol-2-amine (**3g**)

The title compound **3g** was prepared starting directly from previously described **3e**.

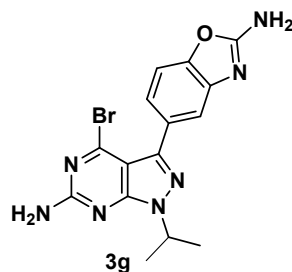

5-(6-Amino-4-chloro-1-isopropyl-1*H*-pyrazolo[3,4-*d*]pyrimidin-3-yl)benzo[*d*]oxazol-2-amine (200 mg, 0.29 mmol, 1.00 eq.) was dissolved in DCM (1 ml). A 1.0 M solution of BBr<sub>3</sub> in DCM (0.58 ml, 0.58 mmol, 2.00 eq.) was added and the reaction mixture was stirred at room temperature for 45 minutes under argon. The reaction mixture was quenched with water and extracted into DCM. The organic phases were combined, dried over MgSO<sub>4</sub> and concentrated to dryness. The residue was purified by mass-triggered preparative LCMS (acidic conditions) to afford the title compound (5.8 mg, 5%) as an orange solid: LCMS (*t*<sub>R</sub>=3.71 min., purity= 91.4%), ESI+ *m/z* 388 (M+H)<sup>+</sup>; <sup>1</sup>H NMR (DMSO-*d*<sub>6</sub>) δ 1.46 (d, *J* = 6.7 Hz, 6H), 4.90 (h, *J* = 6.7 Hz, 1H), 7.25 (td, *J* = 8.2, 2.2 Hz, 3H), 7.40 (d, *J* = 8.3 Hz, 1H), 7.43 (d, *J* = 1.7 Hz, 1H), 7.48 (s, 2H).

HRMS (ESI) calculated for C<sub>15</sub>H<sub>14</sub>BrN<sub>7</sub>O [M+H]<sup>+</sup> 388.0516, found 388.1070.

#### Preparation of 5-(6-Amino-1-isopropyl-4-(trifluoromethyl)-1*H*-pyrazolo[3,4-*d*]pyrimidin-3-yl)benzo[*d*]oxazol-2-amine (**3h**)

The title compound **3h** was prepared following the sequence below:

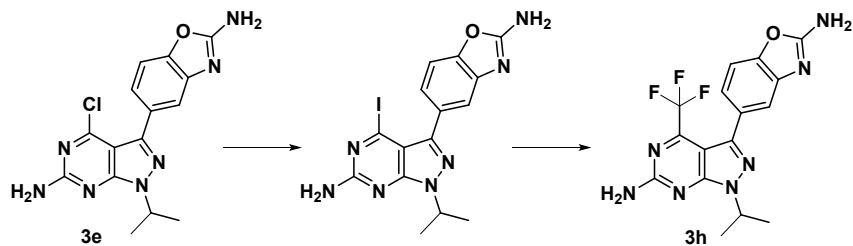

### 5-(6-Amino-4-iodo-1-isopropyl-1H-pyrazolo[3,4-d]pyrimidin-3-yl)benzo[d]oxazol-2-amine

To a stirred suspension of 5-(6-amino-4-chloro-1-isopropyl-1H-pyrazolo[3,4-d]pyrimidin-3-yl)benzo[d]oxazol-2-amine and sodium iodide (1.74 g, 11.6 mmol, 20 eq.) at 0°C, was added hydriodic acid (2.00 ml, 40% w/w, 8.73 mmol, 15 eq.) and the suspension was stirred at room temperature for 4 h. The reaction mixture was diluted with DCM and pour onto a saturated aqueous solution of NaHCO<sub>3</sub>. The aqueous phase was extracted with DCM. The organic phases were combined, washed with a 1M solution of sodium thiosulfate, water, dried over MgSO<sub>4</sub> and concentrated to dryness to afford the title compound (150 mg, 59%) as a beige solid: LCMS (*t<sub>R</sub>*=2.70 min., purity= 97%), ESI+ *m/z* 436 (M+H)<sup>+</sup>; <sup>1</sup>H NMR (DMSO-*d*<sub>6</sub>) δ 1.46 (d, *J* = 6.7 Hz, 6H), 4.90 (h, *J* = 6.7 Hz, 1H), 7.18 (m, 1H), 7.28 (m, 2H), 7.40 (m, 2H), 7.47 (br s, 2H).

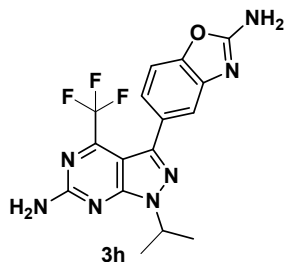

### 5-(6-Amino-1-isopropyl-4-(trifluoromethyl)-1H-pyrazolo[3,4-d]pyrimidin-3-yl)benzo[d]oxazol-2-amine (3h)

To a stirred solution of 5-(6-amino-4-iodo-1-isopropyl-1H-pyrazolo[3,4-d]pyrimidin-3-yl)benzo[d]oxazol-2-amine (70.0 mg, 0.11 mmol, 1.00 eq.) in DMF (1.37 ml) under argon, was added (1,10-phenanthroline)(trifluoromethyl)copper(I) (59.9 mg, 0.19 mmol, 1.70 eq.) and the reaction mixture was stirred at room temperature for 1 h. The reaction mixture was filtered through a pad of Celite and concentrated to dryness. The residue was purified by mass-triggered preparative LCMS (acidic conditions), concentrated to dryness and the solid triturated in a methanolic ammonia solution. The solid was collected by filtration and dried to a constant weight to afford the title compound (**3h**, 10.3 mg, 24%) as a beige solid: LCMS (*t<sub>R</sub>*=0.99 min., purity= 97%), ESI+ *m/z* 378 (M+H)<sup>+</sup>; <sup>1</sup>H NMR (DMSO-*d*<sub>6</sub>) δ 1.48 (d, *J* = 6.7 Hz, 6H), 4.98 (h, *J* = 6.7 Hz, 1H), 7.07 (dd, *J* = 8.1, 1.6 Hz, 1H), 7.26 (d, *J* = 1.6 Hz, 1H), 7.39 (d, *J* = 8.1 Hz, 1H), 7.47 (d, *J* = 12.3 Hz, 4H).

HRMS (ESI) calculated for C<sub>16</sub>H<sub>14</sub>F<sub>3</sub>N<sub>7</sub>O [M+H]<sup>+</sup> 378.1285, found 378.1281.

**Preparation of: 6-Amino-3-(2-aminobenzo[d]oxazol-5-yl)-1-isopropyl-1H-pyrazolo[3,4-d]pyrimidine-4-carbonitrile (3i)**



The title compound **3i** was prepared following the sequence below:

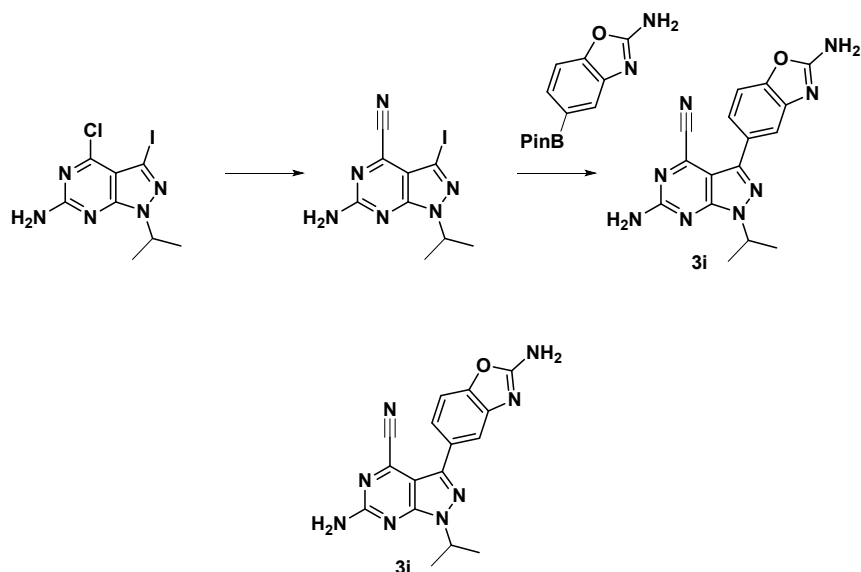

**6-Amino-3-(2-aminobenzo[d]oxazol-5-yl)-1-isopropyl-1H-pyrazolo[3,4-d]pyrimidine-4-carbonitrile (3i)**

To a stirred solution of 4-chloro-3-iodo-1-isopropyl-1H-pyrazolo[3,4-d]pyrimidin-6-amine (500 mg, 1.48 mmol, 1.00 eq.) and 18-CROWN-6 (235 mg, 0.89 mmol, 0.60 eq.) in MeCN (5.0 ml), was added potassium cyanide (96.5 mg, 1.48 mmol, 1.00 eq.) and the reaction mixture was stirred under reflux for 1 h 40 min. The reaction mixture was diluted with brine (pH was basique), and the the aqueous phase was extracted with EtOAc. The organic phases were combinedm washed with brine, dried over MgSO<sub>4</sub> and concentrated to dryness to afford the title compound (474 mg, 85%) as a yellow soild that was used without further purification: LCMS (*t<sub>R</sub>*=1.11 min., purity= 94%), ESI+ *m/z* 329 (M+H)<sup>+</sup>.

In a microwave tube, 6-amino-3-iodo-1-isopropyl-1H-pyrazolo[3,4-d]pyrimidine-4-carbonitrile (40.0 mg, 0.12 mmol, 1.00 eq., 5-(4,4,5,5-tetramethyl-1,3,2-dioxaborolan-2-yl)benzo[d]oxazol-2-amine (47.6 mg, 0.18 mmol, 1.50 eq.) was added to a mixture of a 2.0 M aqueous solution of potassium carbonate (0.18 ml, 0.37 mmol, 3.00 eq.) and 5-(4,4,5,5-tetramethyl-1,3,2-dioxaborolan-2-yl)benzo[d]oxazol-2-amine amine (24.3 mg, 0.09 mmol, 1.50 eq.) and in 1,4-dioxane (0.42 ml). The reaction mixture was degassed and purged with argon. 1,1'-Bis(diphenylphosphino)ferrocene-palladium(II) dichloride, dichloromethane (10 mg, 0.01 mmol, 0.10 eq.) was added and the reaction mixture was heated at 90 °C for 16 h, cooled to room temperature filtered through a pad of Celite and concentrated to dryness. The residue was purified directly by mass-triggered preparative LCMS (acidic conditions) to afford the title compound (**3i**, 5.0 mg, 12%) as a yellow solid: LCMS (*t<sub>R</sub>*=0.94min., purity= 98%), ESI+ *m/z* 335 (M+H)<sup>+</sup>; <sup>1</sup>H NMR (DMSO-*d*<sub>6</sub>) δ 1.49 (d, *J* = 6.7 Hz, 6H), 4.94 (h, *J* = 6.7 Hz, 1H), 7.41 (dd, *J* = 8.3, 1.7 Hz, 1H), 7.46 (d, *J* = 8.2 Hz, 3H), 7.53 (s, 2H), 7.60 (d, *J* = 1.9 Hz, 1H).

HRMS (ESI) calculated for C<sub>16</sub>H<sub>14</sub>N<sub>8</sub>O [M+H]<sup>+</sup> 335.1363, found 335.1360.

**Preparation of 3-(2-Aminobenzo[d]oxazol-5-yl)-1-isopropyl-1H-pyrazolo[3,4-d]pyrimidine-4,6-diamine (3j)**

The title compound **3j** was prepared following the sequence below:

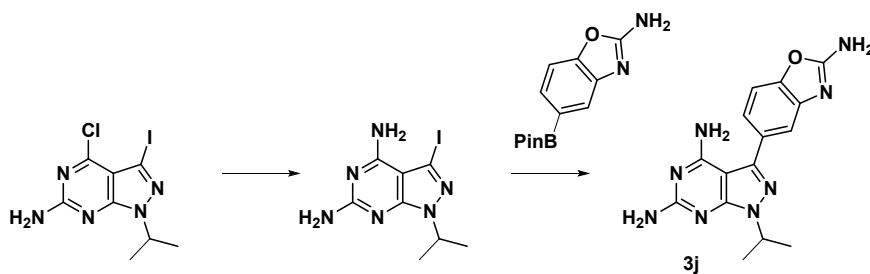

### 3-iodo-1-isopropyl-1H-pyrazolo[3,4-d]pyrimidine-4,6-diamine

A suspension of 4-chloro-3-iodo-1-isopropyl-1H-pyrazolo[3,4-d]pyrimidin-6-ylamine (1.50 g, 4.44 mmol, 1.00 eq.) in 1,4-dioxane (7.95 ml) and ammonia (7.10 ml, 32.00 % w/w, 13.33 mmol, 3.00 eq.) was heated at 100°C for 4 h and allowed to cool to room temperature during the night. The solid formed was collected by filtration and dried to a constant weight to afford the title compound (1.38 g, 97%) as a white solid: : LCMS ( $t_R$ =0.70min., purity= 98%), ESI+  $m/z$  319 (M+H)<sup>+</sup>; <sup>1</sup>H NMR (DMSO- $d_6$ )  $\delta$  1.36 (d,  $J$  = 6.6 Hz, 6H), 4.73 (h,  $J$  = 6.6 Hz, 1H), 6.26 (br s, 2H), 7.02 (br s, 2H).

### 3-(2-Aminobenzo[d]oxazol-5-yl)-1-isopropyl-1H-pyrazolo[3,4-d]pyrimidin-4,6-diamine (**3j**)

In a microwave tube, were added 3-iodo-1-isopropyl-1H-pyrazolo[3,4-d]pyrimidin-4,6-diamine (700 mg, 2.20 mmol, 1.00 eq.), 5-(4,4,5,5-tetramethyl-1,3,2-dioxaborolan-2-yl)benzo[d]oxazol-2-amine (858 mg, 3.30 mmol, 1.50 eq.) and a 2.0 M aqueous solution of potassium carbonate (3.30 ml, 6.60 mmol, 3.00 eq.) in 1,4-dioxane (7.35 ml) and the reaction mixture was degassed and purged with argon. 1,1'-Bis(diphenylphosphino)ferrocenepalladium(ii) dichloride, dichloromethane (180 mg, 0.22 mmol, 0.10 eq.) was added and the reaction mixture was heated at 100 °C under microwave irradiation. The reaction mixture was allowed to cool to room temperature, filtered and the filtrate was diluted with EtOAc and water. The organic phase was washed with brine, filtered and dried over MgSO<sub>4</sub> and concentrated to dryness. The residue was suspended in DCM and collected by filtration then suspended in not MeOH in the presence of activated charcoal. The suspension was filtered and a solid crystallised that was collected by filtration, dried to a constant weight to afford the title compound (**3j**, 285 mg, 40%) as an off-white solid: LCMS ( $t_R$ =0.66min., purity= 100%), ESI+  $m/z$  325 (M+H)<sup>+</sup>; <sup>1</sup>H NMR (DMSO- $d_6$ )  $\delta$  1.43 (d,  $J$  = 6.7 Hz, 6H), 4.79-4.85 (p,  $J$  = 6.7 Hz, 1H), 6.14 (s, 2H), 7.18-7.21 (dd,  $J$  = 8.1-1.7 Hz, 1H), 7.36 (d,  $J$  = 1.7 Hz, 1H), 7.43 (d,  $J$  = 8.1 Hz, 1H), 7.50 (s, 2H).

HRMS (ESI) calculated for C<sub>15</sub>H<sub>16</sub>N<sub>8</sub>O [M+H]<sup>+</sup> 325.1520, found 325.1518.

## Preparation of 3-(2-Aminobenzo[d]oxazol-5-yl)-1-isopropyl-1H-pyrazolo[3,4-d]pyrimidine-4,6-diamine (3k)

The title compound **3k** was prepared directly from previously described **3e**:

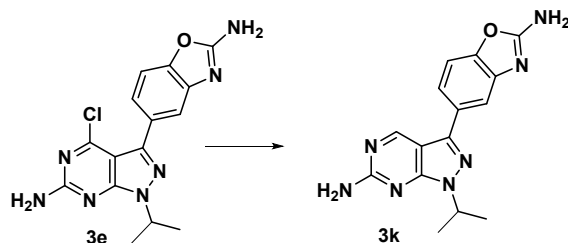

5-(6-Amino-4-chloro-1-isopropyl-1H-pyrazolo[3,4-d]pyrimidin-3-yl)benzo[d]oxazol-2-amine (30 mg, 0.09 mmol, 1.00 eq.) was dissolved in MeOH (0.30 ml) and the reaction mixture was degassed then 10% Pd-C (18.6 mg, 0.01 mmol, 0.10 eq.) was added. The reaction mixture was degassed and purged with hydrogen and stirred at room temperature for 48 h. The reaction mixture was filtered through a pad of Celite, concentrated to dryness and purified by mass-triggered preparative LCMS (basic conditions) to afford the title compound (**3k**, 7.9 mg, 29%): LCMS ( $t_R=0.86$  min., purity= 100%), ESI+  $m/z$  310 (M+H)<sup>+</sup>; <sup>1</sup>H NMR (DMSO-*d*<sub>6</sub>)  $\delta$  1.41 (d,  $J = 6.7$  Hz, 6H), 4.77-4.83 (hp,  $J = 6.7$  Hz, 1H), 6.12 (s, 2H), 7.14-7.19 (dd,  $J = 8.1-1.7$  Hz, 1H), 7.34 (d,  $J = 1.7$  Hz, 1H), 7.43 (d,  $J = 8.1$  Hz, 1H), 7.49 (s, 2H), 8.72 (s, 1H).

HRMS (ESI) calculated for C<sub>15</sub>H<sub>15</sub>N<sub>7</sub>O [M+H]<sup>+</sup> 310.1411, found 310.1409

### Preparation of compounds shown in Table 3. Pyrazolopyrimidones exploration

#### Preparation of 6-Amino-3-(2-aminobenzo[d]oxazol-5-yl)-1-isopropyl-1,5-dihydro-4H-pyrazolo[3,4-d]pyrimidin-4-one (6a)

The title compound **6a** was prepared directly from previously described **3d**:

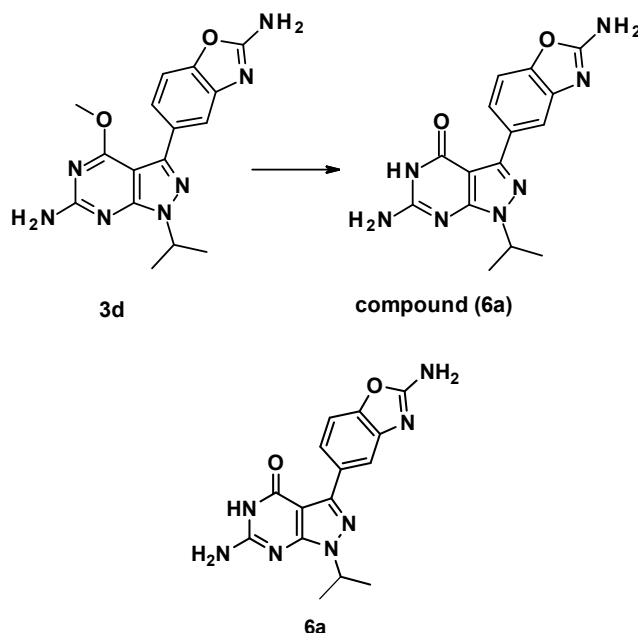

#### 6-Amino-3-(2-aminobenzo[d]oxazol-5-yl)-1-isopropyl-1,5-dihydro-4H-pyrazolo[3,4-d]pyrimidin-4-one (6a)

5-(6-Amino-1-isopropyl-4-methoxy-1H-pyrazolo[3,4-d]pyrimidin-3-yl)benzo[d]oxazol-2-amine **3d** (67 mg, 0.20 mmol, 1.00 eq.) was dissolved in DCM (0.5 ml) and cooled down to 0°C for 30 min. A 1.0 M solution of BBr<sub>3</sub> in DCM (0.33 ml, 0.33 mmol, 3.00 eq.) was added and the reaction mixture was stirred at room temperature overnight under argon. The reaction mixture was quenched with water and extracted into DCM. The organic phases were combined, dried over MgSO<sub>4</sub> and concentrated to dryness. The residue was purified by mass-triggered preparative LCMS (acidic conditions) to afford the title compound (**6a**, 3.3 mg, 5%) as an orange solid. LCMS (purity= 97%), ESI+ m/z 326 (M+H)<sup>+</sup>; <sup>1</sup>H NMR (DMSO-*d*<sub>6</sub>) δ 1.43 (d, *J* = 6.6 Hz, 6H), 4.79 (h, *J* = 6.7 Hz, 1H), 6.67 (s, 2H), 7.32 (d, *J* = 8.5 Hz, 1H), 7.38 (s, 2H), 8.00 (dd, *J* = 8.4, 1.7 Hz, 1H), 8.24 (d, *J* = 1.7 Hz, 1H), 10.68 (s, 1H).

HRMS (ESI) calculated for C<sub>15</sub>H<sub>15</sub>N<sub>7</sub>O<sub>2</sub> [M+H]<sup>+</sup> 326.1360, found 326.1359.

#### Preparation of:

- 3-(2-Aminobenzo[d]oxazol-5-yl)-1-isopropyl-6-(methylamino)-1,5-dihydro-4H-pyrazolo[3,4-d]pyrimidin-4-one (**6b**)
- 3-(2-Aminobenzo[d]oxazol-5-yl)-6-(dimethylamino)-1-isopropyl-1,5-dihydro-4H-pyrazolo[3,4-d]pyrimidin-4-one (**6c**)

The compounds **6b** and **6c** were prepared following the sequence below:

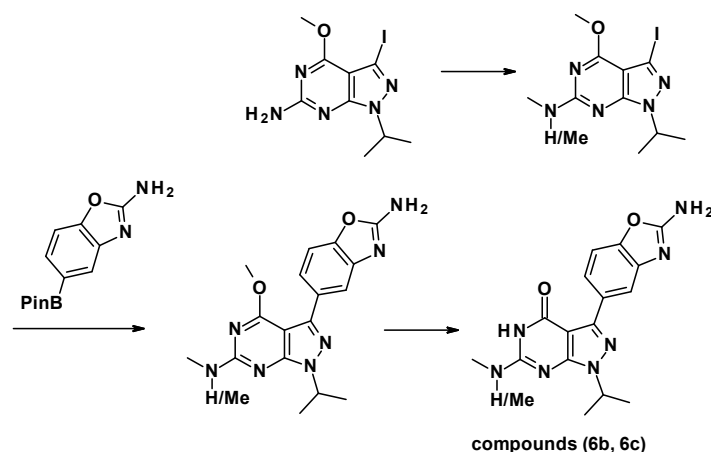

### 3-iodo-1-isopropyl-4-methoxy-*N*-methyl-1*H*-pyrazolo[3,4-*d*]pyrimidin-6-amine

To a stirred solution of 3-iodo-1-isopropyl-4-methoxy-1*H*-pyrazolo[3,4-*d*]pyrimidin-6-amine (100 mg, 0.30 mmol, 1.00 eq.) in anhydrous THF (1.0 ml) under argon was added at 0°C iodomethane (20.6  $\mu$ l, 0.33 mmol, 1.10 eq.). The reaction mixture was stirred at 0°C for 5 min before the addition of sodium hydride (13.21  $\square$ , 0.33 mmol, 1.10 eq.). Then, the reaction mixture was stirred at room temperature for 6 hours, quenched with a saturated solution of ammonium chloride and extracted into EtOAc. The organic phases were washed with brine, dried over MgSO<sub>4</sub> and concentrated to dryness. The residue was purified by flash chromatography (silica gel, heptane:EtOAc 9:1) to afford the title compound (51 mg, 49%) as an orange solid: LCMS (purity= 97%), ESI+ *m/z* 348 (M+H)<sup>+</sup>; <sup>1</sup>H NMR (DMSO-*d*<sub>6</sub>)  $\delta$  1.39 (d, *J* = 6.7 Hz, 6H), 2.82 (d, *J* = 4.4 Hz, 3H), 3.96 (s, 3H), 4.82 (s, 1H), 7.32 (s, 1H)

### 5-(1-isopropyl-4-methoxy-6-(methylamino)-1*H*-pyrazolo[3,4-*d*]pyrimidin-3-yl)benzo[*d*]oxazol-2-amine

In a microwave tube, 3-iodo-1-isopropyl-4-methoxy-*N*-methyl-1*H*-pyrazolo[3,4-*d*]pyrimidin-6-amine (50.0 mg, 0.22 mmol, 1.00 eq.) and a 2.0M aqueous solution of potassium carbonate (0.22 ml, 0.43 mmol, 3.00 eq.) in 1,4-dioxane (0.8 ml) were degassed and purged with argon. 1,1'-Bis(diphenylphosphino)ferrocenepalladium(II) dichloride.dichloromethane (11.8 mg, 0.01 mmol, 0.10 eq.) was added followed by 5-(4,4,5,5-tetramethyl-1,3,2-dioxaborolan-2-yl)benzo[*d*]oxazol-2-amine (56.2 mg, 0.22 mmol, 1.50 eq.) and the reaction mixture was heated at 100 °C for 30 min. The reaction mixture was cooled to room temperature. Water and EtOAc were added and the organic phase was extracted with EtOAc. The organic phases were washed with brine, dried over MgSO<sub>4</sub> and concentrated to dryness to afford the title compound (87 mg, 99%). 5-(1-isopropyl-4-methoxy-6-(methylamino)-1*H*-pyrazolo[3,4-*d*]pyrimidin-3-yl)benzo[*d*]oxazol-2-amine was directly used in the next step without further purification. ; LCMS (purity= 97%), ESI+ *m/z* 354 (M+H)<sup>+</sup>.

### 3-(2-Aminobenzo[*d*]oxazol-5-yl)-1-isopropyl-6-(methylamino)-1,5-dihydro-4*H*-pyrazolo[3,4-*d*]pyrimidin-4-one (6b)

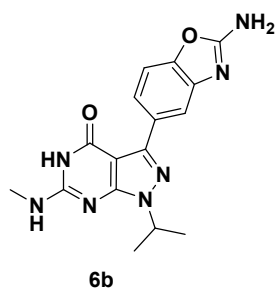

5-(1-isopropyl-4-methoxy-6-(methylamino)-1*H*-pyrazolo[3,4-*d*]pyrimidin-3-yl)benzo[*d*]oxazol-2-amine (67 mg, 0.11 mmol, 1.00 eq.) was dissolved in DCM (0.4 ml) and cooled down to 0°C for 30 min. A 1.0 M solution of BBr<sub>3</sub> in DCM (0.33 ml, 0.33 mmol, 3.00 eq.) was added and the reaction mixture was stirred at room temperature overnight under argon. The reaction mixture was quenched with water and extracted into DCM. The organic phases were combined, dried over MgSO<sub>4</sub> and concentrated to dryness. The residue was purified by mass-triggered preparative LCMS (acidic conditions) to afford the title compound (2.0 mg, 5%) as a white solid. LCMS (purity= 97%), ESI+ *m/z* 340 (M+H)<sup>+</sup>; <sup>1</sup>H NMR (DMSO-*d*<sub>6</sub>) δ 1.45 (d, *J* = 6.7 Hz, 6H), 2.86 (d, *J* = 4.7 Hz, 3H), 4.85 (h, *J* = 6.7 Hz, 1H), 6.40 (s, 1H), 7.32 (d, *J* = 8.3 Hz, 1H), 7.38 (s, 2H), 8.00 (dd, *J* = 8.3, 1.7 Hz, 1H), 8.24 (d, *J* = 1.7 Hz, 1H), 10.65 (s, 1H).

HRMS (ESI) calculated for C<sub>16</sub>H<sub>17</sub>N<sub>7</sub>O<sub>2</sub> [M+H]<sup>+</sup> 340.1516, found 340.1515.

### Preparation of 3-(2-Aminobenzo[*d*]oxazol-5-yl)-6-(dimethylamino)-1-isopropyl-1,5-dihydro-4*H*-pyrazolo[3,4-*d*]pyrimidin-4-one (6c)

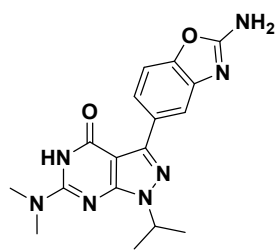

6c

### 3-iodo-1-isopropyl-4-methoxy-*N,N*-dimethyl-1*H*-pyrazolo[3,4-*d*]pyrimidin-6-amine

To a stirred solution of 3-Iodo-1-isopropyl-4-methoxy-1*H*-pyrazolo[3,4-*d*]pyrimidin-6-amine (150 mg, 0.45 mmol, 1.00 eq.) in anhydrous THF (1.1 ml) under argon was added at 0°C iodomethane (60 μl, 0.99 mmol, 2.20 eq.). The reaction mixture was stirred at 0°C for 5 min before the addition of sodium hydride (39.6 mg, 0.99 mmol, 2.20 eq.). Then, the reaction mixture was stirred at room temperature for 6 hours, quenched with a saturated solution of ammonium chloride and extracted into EtOAc. The organic phases were washed with brine, dried over MgSO<sub>4</sub> and concentrated to dryness. The residue was purified by flash chromatography (silica gel, heptane:EtOAc 9:1) to afford the title compound (154 mg, 95%) as an orange solid: LCMS (purity= 97%), ESI+ *m/z* 362 (M+H)<sup>+</sup>; <sup>1</sup>H NMR (DMSO-*d*<sub>6</sub>) δ 1.40 (d, *J* = 6.7 Hz, 6H), 3.17 (s, 6H), 4.01 (s, 3H), 4.84 (p, *J* = 6.6 Hz, 1H).

### 3-(2-Aminobenzo[*d*]oxazol-5-yl)-6-(dimethylamino)-1-isopropyl-1,5-dihydro-4*H*-pyrazolo[3,4-*d*]pyrimidin-4-one (6c)

In a microwave tube, 3-iodo-1-isopropyl-4-methoxy-*N,N*-dimethyl-1*H*-pyrazolo[3,4-*d*]pyrimidin-6-amine (165.0 mg, 0.46 mmol, 1.00 eq.) and a 2.0M aqueous solution of potassium carbonate (685 μl, 1.37 mmol, 3.00 eq.) in 1,4-dioxane (2.5 ml) were degassed and purged with argon. 1,1'-Bis(diphenylphosphino)ferrocenepalladium(II) dichloride.dichloromethane (37.3 mg, 0.05 mmol, 0.10 eq.) was added followed by 5-(4,4,5,5-tetramethyl-1,3,2-dioxaborolan-2-yl)benzo[*d*]oxazol-2-amine (178 mg, 0.69 mmol, 1.50 eq.) and the reaction mixture was heated at 100 °C for 30 min. The reaction mixture was cooled to room temperature. Water and EtOAc were added and the organic phase was extracted with EtOAc. The organic phases were washed with brine, dried over MgSO<sub>4</sub> and concentrated to dryness to afford the title compound (167mg, 99%). 5-(6-(dimethylamino)-1-isopropyl-4-methoxy-1*H*-pyrazolo[3,4-*d*]pyrimidin-3-yl)benzo[*d*]oxazol-2-amine was directly used in the next step without further purification; LCMS (purity= 97%), ESI+ *m/z* 368 (M+H)<sup>+</sup>.

To 5-(6-(dimethylamino)-1-isopropyl-4-methoxy-1*H*-pyrazolo[3,4-*d*]pyrimidin-3-yl)benzo[*d*]oxazol-2-amine (95.0 mg, 0.26 mmol, 1.00 eq.) was added a 4M solution of hydrogen chloride in dioxane (0.65 ml, 2.59 mmol, 10.0 eq.). The mixture was stirred for 2 hours at room temperature and cooled down to 0°C to be quenched with a saturated solution of NaHCO<sub>3</sub> and extracted into AcOEt. The organic phases were combined, dried over MgSO<sub>4</sub> and concentrated to dryness. The residue was precipitated in DMF, filtrated and washed with water to obtain the title compound (**6d**, 16.8 mg, 18%) as a white solid. LCMS (purity= 97%), ESI+ *m/z* 354 (M+H)<sup>+</sup>; <sup>1</sup>H NMR (DMSO-*d*<sub>6</sub>) δ 1.45 (d, *J* = 6.7 Hz, 6H), 3.11 (s, 6H), 4.84 (h, *J* = 6.7 Hz, 1H), 7.34 (d, *J* = 8.3 Hz, 1H), 7.38 (s, 2H), 7.99 (dd, *J* = 8.4, 1.7 Hz, 1H), 8.25 (d, *J* = 1.7 Hz, 1H), 10.60 (s, 1H).

HRMS (ESI) calculated for C<sub>17</sub>H<sub>19</sub>N<sub>7</sub>O<sub>2</sub> [M+H]<sup>+</sup> 354.1673, found 354.1670.

### Preparation of 3-(2-Aminobenzo[*d*]oxazol-5-yl)-1-isopropyl-6-methyl-1,5-dihydro-4*H*-pyrazolo[3,4-*d*]pyrimidin-4-one (**6d**)

Compound **6d** was prepared following the sequence below:

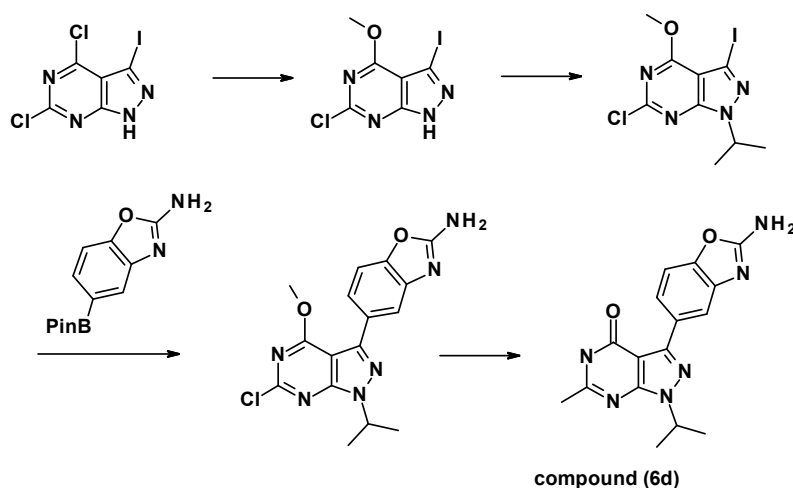

### 5-(6-chloro-1-isopropyl-4-methoxy-1*H*-pyrazolo[3,4-*d*]pyrimidin-3-yl)benzo[*d*]oxazol-2-amine

To a stirred solution of 4,6-dichloro-3-iodo-1*H*-pyrazolo[3,4-*d*]pyrimidine (400.0 mg, 1.27 mmol, 1.00 eq.) in MeOH (2.4 ml) was added 30% solution of sodium methoxide in MeOH (0.25 ml, 1.33 mmol, 1.05 eq.). The reaction mixture was stirred at room temperature overnight, quenched with a saturated solution of ammonium chloride and extracted into EtOAc. The organic phases were washed with brine, dried over MgSO<sub>4</sub> and concentrated to dryness to afford the title compound (385 mg, 97%) as a white solid: LCMS (purity= 99%), ESI+ *m/z* 311 (M+H)<sup>+</sup>. 6-Chloro-3-iodo-4-methoxy-1*H*-pyrazolo[3,4-*d*]pyrimidine was engaged in the next step without further purification.

2-Iodopropane (106.3 ml, 1.06 mmol, 1.10 eq.) was added to a stirred solution of 6-Chloro-3-iodo-4-methoxy-1*H*-pyrazolo[3,4-*d*]pyrimidine (7.92 g, 37.0 mmol, 1.00 eq.) and cesium carbonate (346.0 mg, 1.06 mmol, 1.10 eq.) in DMF (3 ml). The reaction mixture was stirred at room temperature for 2 hours, filtered and the filtrate was purified by flash chromatography over silica gel. The fractions were evaporated and the residue crystallised from heptane/EtOAc. The solid was collected by filtration and dried to a constant weight to afford the title compound (170 mg, 49%) as a beige solid:

LCMS (purity= 99%), ESI+ m/z 353 (M+H)<sup>+</sup>. 6-Chloro-3-iodo-1-isopropyl-4-methoxy-1*H*-pyrazolo[3,4-*d*]pyrimidin was engaged in the next step without further purification.

In a microwave tube, 6-Chloro-3-iodo-1-isopropyl-4-methoxy-1*H*-pyrazolo[3,4-*d*]pyrimidine (170.0 mg, 0.48 mmol, 1.00 eq.) and a 2.0M aqueous solution of potassium carbonate (724  $\mu$ l, 1.45 mmol, 3.00 eq.) in 1,4-dioxane (1.7 ml) were degassed and purged with argon. 1,1'-Bis(diphenylphosphino)ferrocenepalladium(II) dichloride.dichloromethane (39.4 mg, 0.05 mmol, 0.10 eq.) was added followed by 5-(4,4,5,5-tetramethyl-1,3,2-dioxaborolan-2-yl)benzo[*d*]oxazol-2-amine (188 mg, 0.72 mmol, 1.50 eq.) and the reaction mixture was heated at 100 °C for 30 min. The reaction mixture was cooled to room temperature. Water and EtOAc were added and the organic phase was extracted with EtOAc. The organic phases were washed with brine, dried over MgSO<sub>4</sub> and concentrated to dryness. The residue was purified by mass-triggered preparative LCMS (acidic conditions) to afford the title compound (29.0 mg, 16%) as a white solid.; LCMS (purity= 97%), ESI+ m/z 359 (M+H)<sup>+</sup>. <sup>1</sup>H NMR (DMSO-*d*<sub>6</sub>)  $\delta$  1.53 (d, *J* = 6.6 Hz, 6H), 4.12 (s, 3H), 5.03 – 5.12 (m, 1H), 7.44 (d, *J* = 8.3 Hz, 1H), 7.50 (s, 2H), 7.61 (dd, *J* = 8.3, 1.8 Hz, 1H), 7.77 (d, *J* = 1.7 Hz, 1H).

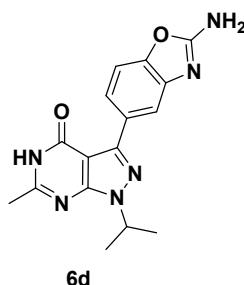

### 3-(2-Aminobenzo[*d*]oxazol-5-yl)-1-isopropyl-6-methyl-1,5-dihydro-4*H*-pyrazolo[3,4-*d*]pyrimidin-4-one (6d)

5-(6-chloro-1-isopropyl-4-methoxy-1*H*-pyrazolo[3,4-*d*]pyrimidin-3-yl)benzo[*d*]oxazol-2-amine (29.0 mg, 0.08 mmol, 1.00 eq.) was dissolved in THF (150  $\mu$ l) and bis(tri-*t*-butylphosphine)palladium(0) (8.3 mg, 0.02 mmol, 0.20 eq.) was added at 0 °C. The reaction mixture was degassed and purged with argon and 1M solution of dimethylzinc in heptane (245  $\mu$ l, 0.24 mmol, 3.00 eq.) was added keeping the temperature at 0 °C. The reaction mixture was stirred at room temperature overnight, quenched with a saturated aqueous solution of ammonium chloride and extracted with EtOAc. The organic phase was washed with brine, dried over MgSO<sub>4</sub> and concentrated to dryness. A 4M solution of hydrogen chloride in dioxane (0.20 ml, 0.81 mmol, 10.0 eq.) was added to the residue and the mixture stirred for 5 hours at room temperature. The crude mixture is diluted with DMF and purified by mass-triggered preparative HPLC (acidic method) to afford the title compound (3.0 mg, 11%) as a white solid: LCMS (purity= 97%), ESI+ m/z 339 (M+H)<sup>+</sup>; <sup>1</sup>H NMR (400 MHz, DMSO-*d*<sub>6</sub>)  $\delta$  1.47 (d, *J* = 6.6 Hz, 6H), 2.38 (s, 3H), 5.00 (p, *J* = 6.6 Hz, 1H), 7.36 (d, *J* = 8.4 Hz, 1H), 7.42 (s, 2H), 8.03 (dd, *J* = 8.3, 1.7 Hz, 1H), 8.26 (d, *J* = 1.7 Hz, 1H), 12.07 (s, 1H).

HRMS (ESI) calculated for C<sub>16</sub>H<sub>16</sub>N<sub>6</sub>O<sub>2</sub> [M+H]<sup>+</sup> 325.1408, found 325.1404.

### Preparation of 3-(2-aminobenzo[*d*]oxazol-5-yl)-1-isopropyl-1,5-dihydro-4*H*-pyrazolo[3,4-*d*]pyrimidin-4-one (6e)

The compounds 6e was prepared following the sequence below:



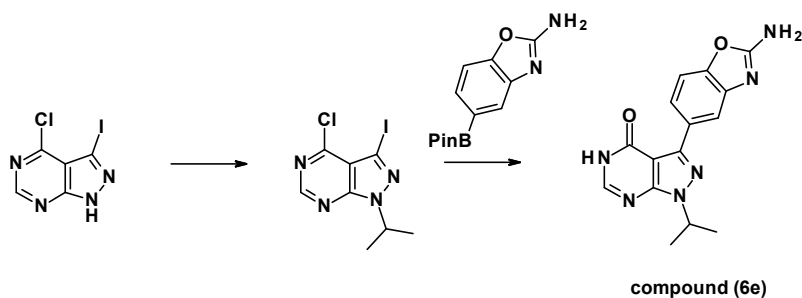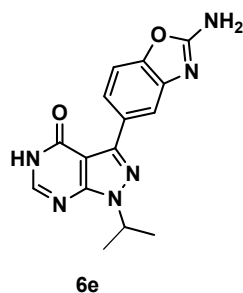

### 3-(2-aminobenzo[d]oxazol-5-yl)-1-isopropyl-1,5-dihydro-4H-pyrazolo[3,4-d]pyrimidin-4-one (6e)

2-Iodopropane (690 ml, 6.93 mmol, 1.05 eq.) was added to a stirred solution of commercially available 6-Chloro-3-iodo-1*H*-pyrazolo[3,4-*d*]pyrimidine (1.85 g, 6.60 mmol, 1.00 eq.) and cesium carbonate (4.30 g, 13.19 mmol, 2.0 eq.) in DMF (35 ml). The reaction mixture was stirred at room temperature for 2 hours, filtered and the filtrate was purified by flash chromatography over silica gel. The fractions were evaporated and the residue crystallised from heptane / EtOAc. The solid was collected by filtration and dried to a constant weight to afford the title compound (1.80 g, 82%) as a beige solid: LCMS (purity= 95%), ESI+ *m/z* 323 (M+H)<sup>+</sup>; <sup>1</sup>H NMR (DMSO-*d*<sub>6</sub>) δ 1.51 (d, *J* = 6.6 Hz, 6H), 5.04 (p, *J* = 6.7 Hz, 1H), 9.43 (s, 1H). 6-Chloro-3-iodo-1-isopropyl-4-methoxy-1*H*-pyrazolo[3,4-*d*]pyrimidin was engaged in the next step without further purification.

In a microwave tube, 4-chloro-3-iodo-1-isopropyl-1*H*-pyrazolo[3,4-*d*]pyrimidine (92.0 mg, 0.29 mmol, 1.00 eq.) and a 2.0M aqueous solution of potassium carbonate (430 μl, 0.86 mmol, 3.00 eq.) in 1,4-dioxane (1.4 ml) were degassed and purged with argon. 1,1'-Bis(diphenylphosphino)ferrocenepalladium(II) dichloride.dichloromethane (23.29 mg, 0.03 mmol, 0.10 eq.) was added followed by 5-(4,4,5,5-tetramethyl-1,3,2-dioxaborolan-2-yl)benzo[d]oxazol-2-amine (111.3 mg, 0.43 mmol, 1.50 eq.) and the reaction mixture was heated at 100 °C for 4 hours to obtain complete hydrolysis of the chloride. The reaction mixture was cooled to room temperature. Water and EtOAc were added and the organic phase was extracted with EtOAc. The organic phases were washed with brine, dried over MgSO<sub>4</sub> and concentrated to dryness. The residue was purified by mass-triggered preparative LCMS (acidic conditions) to afford the title compound (**6e**, 10.0 mg, 11%) as a white solid.; LCMS (purity= 97%), ESI+ *m/z* 311 (M+H)<sup>+</sup>. <sup>1</sup>H NMR (DMSO-*d*<sub>6</sub>) δ 1.51 (d, *J* = 6.6 Hz, 6H), 5.04 (p, *J* = 6.7 Hz, 1H), 7.38 (d, *J* = 8.3 Hz, 1H), 7.44 (s, 2H), 8.02 (dd, *J* = 8.4, 1.8 Hz, 1H), 8.08 (s, 1H), 8.25 (d, *J* = 1.7 Hz, 1H), 12.20 (s, 1H).

HRMS (ESI) calculated for C<sub>15</sub>H<sub>14</sub>N<sub>6</sub>O<sub>2</sub> [M+H]<sup>+</sup> 311.1251, found 311.1250.

<sup>1</sup> Valko, K.; Bevan, C.; Reynolds, D. Chromatographic hydrophobicity index by fast-gradient RP-HPLC: A high-throughput alternative to logP/logD. *Anal. Chem.* **1997**, *69*, 2022-2029.

---

<sup>2</sup> Young, R. J.; Green, D. V. S.; Luscombe, C. N.; Hill, A. P. Getting physical in drug discovery II: the impact of chromatographic hydrophobicity measurements and aromaticity. *Drug Disc. Today* **2011**, *16*(17/18), 822-830
